# Supplementary material
Source: PubMed Central journal article supplement (PMC8789245)

# THE LANCET

## Infectious Diseases

### Supplementary appendix

This appendix formed part of the original submission and has been peer reviewed. We post it as supplied by the authors.

Supplement to: Sridhar S, Joaquin A, Bonaparte MI, et al. Safety and immunogenicity of an AS03-adjuvanted SARS-CoV-2 recombinant protein vaccine (CoV2 preS dTM) in healthy adults: interim findings from a phase 2, randomised, dose-finding, multicentre study. *Lancet Infect Dis* 2022; published online Jan 25. [https://doi.org/10.1016/S1473-3099\(21\)00764-7](https://doi.org/10.1016/S1473-3099(21)00764-7).

## Supplementary Materials to:

# Safety and immunogenicity of a SARS-CoV-2 recombinant protein vaccine with AS03 adjuvant in healthy adults: interim findings from a phase 2, randomised, dose-finding, multi-centre study

Sridhar S *et al.*

## Contents

|                                                                                                                                                                     |    |
|---------------------------------------------------------------------------------------------------------------------------------------------------------------------|----|
| List of contributors .....                                                                                                                                          | 3  |
| Methods 1. Participant inclusion/exclusion criteria .....                                                                                                           | 4  |
| Methods 2. Determination of SARS-CoV-2 naïve or non-naïve status for immunogenicity assessment.....                                                                 | 5  |
| Methods 3. Measurement of SARS-CoV-2 neutralising antibody titres using a pseudovirus neutralisation assay 6                                                        |    |
| Table S1. Participant demographic characteristics, by age group (safety analysis set) .....                                                                         | 7  |
| Table S2. High-risk medical conditions of study participants (full analysis set).....                                                                               | 9  |
| Table S3: Safety overview after any injection by age stratum (safety analysis set) .....                                                                            | 10 |
| Table S4. Most frequently reported unsolicited adverse reactions occurring up to 21 days after any vaccination (MedDRA preferred terms) (safety analysis set) ..... | 13 |
| Table S5: Safety overview after any injection by SARS-CoV-2 positivity at baseline (D1) (safety analysis set) 14                                                    |    |
| Table S6. Safety overview after any injection by presence of at least one high-risk medical condition at baseline (D1) (safety analysis set) .....                  | 17 |
| Table S7: Neutralising antibody responses to D614G after the first injection (day 22), by age group (PPAS naïve D1+D22).....                                        | 20 |
| Table S8. D614G neutralising antibody response after two injections in naïve participants by presence of high-risk medical condition (PPAS-naïve D1+D22).....       | 21 |
| Table S9. D614G binding antibody profile at D36, overall, by age and by SARS-CoV-2 naïve status (PPAS)..                                                            | 22 |

|                                                                                                                                                                                                                                                |    |
|------------------------------------------------------------------------------------------------------------------------------------------------------------------------------------------------------------------------------------------------|----|
| Table S10: Neutralising antibody responses to D614G after the first (day 22) and second (day 36) injections, by age group (PPAS non-naïve D1/D22) .....                                                                                        | 24 |
| Table S11. Neutralising antibody responses to the SARS-CoV-2 Beta variant 14 days after the second injection (D36) (PPAS naïve D1+D22 and PPAS non-naïve D1/D22) .....                                                                         | 26 |
| Table S12. Geometric means of fold-rise from baseline for individual cytokines after stimulation with S protein in whole blood (stimulated values minus negative control) (CMI analysis set) .....                                             | 27 |
| Figure S1. Solicited injection site and solicited systemic adverse reactions occurring over the first seven days after the second vaccination for each antigen group, in younger adults (A; 18–59 years) and older adults (B; ≥60 years) ..... | 28 |
| Figure S2. Neutralising antibody response to the Beta variant, 14 days after the second injection of CoV2 preS dTM-AS03 (all dose groups combined), by SARS-CoV-2 naïve status .....                                                           | 32 |
| Figure S3. CMI analyses – ratios of fold-rises for IFN- $\gamma$ (A), IL-2 (B) and TNF- $\alpha$ (C) to IL-4, IL-5 and IL-13 at Day 22 and Day 36 (CMIAS) .....                                                                                | 33 |

## List of contributors

**Brigham and Women's Hospital, Boston, MA, USA:** Lindsey R. Baden, Jennifer A. Johnson, Amy C. Sherman, Michaël Desjardins, Jane A. Kleinjan, Jon A. Gothing, Megan P. Powell, Julia E. Klopfer; **Charles R. Drew University:** David Hardy, MD; Naureen Taureen, MD; **Demedica, San Pedro Sula, Honduras:** Luis Cousin MD; Delmy Mejía MD; Jorge Cortés MD ; Catherine Hardy MD; Engels Cardona MD; Allan R. Bueso MD; Blanca Panting MD; Marcelo Forgas MD; Belinda Andino MD; **Emory University School of Medicine, Atlanta, GA, USA:** Amy Anderson, Cecilia Losada, MD; Jessica Traenkner, PA; Nicholas Scanlon, MD with support from the NIH R38 Stimulating Access to Research in Residency (StARR) grant (5R38AI140299-02); **INVERIME investigators:** Silvia M Rivera MD, Sara E Rivera MD and Celim Chau MD; **New York University Grossman School of Medicine, New York, USA:** Tamia Davis, Heather Givans, Ramin Sedaghat Herati, Alexander McMeeking, Mark J. Mulligan, Mary Olson, Lalitha Parameswaran, Purvi Parikh, Rebecca Pellett Madan, Bo Shopsin, Janine Sullivan, Elizabeth Veneskey, Mahija Vucetovic; **The George Washington School of Medicine and Health Sciences, Washington, DC, USA:** Elissa Malkin DO, Caroline Thoreson PA-C, Marc Siegel MD; **Yale University School of Medicine, New Haven, Connecticut, USA:** Jessica Tuan MD.

## Methods 1. Participant inclusion/exclusion criteria.

Adults, aged 18 years and older, were eligible. Exclusion criteria included women who were pregnant or lactating, or, for those of childbearing potential, not using an effective method of contraception or abstinence from at least 4 weeks prior to the first vaccination until at least 12 weeks after the last vaccination; known systemic hypersensitivity to any of the vaccine components, or history of a life-threatening reaction to a vaccine containing any of the same substances; dementia or any other cognitive condition at a stage that could interfere with following the trial procedures based on Investigator or designee's judgment; self-reported thrombocytopenia, contraindicating intramuscular (IM) vaccination based on Investigator or designee's judgment; bleeding disorder, or receipt of anticoagulants in the past 21 days preceding inclusion, contraindicating IM vaccination based on Investigator or designee's judgment; unstable acute or chronic illness that in the opinion of the Investigator or designee poses additional risk as a result of participation or that could interfere with the trial procedures; receipt of solid-organ or bone marrow transplants in the past 180 days; receipt of anti-cancer chemotherapy in the last 90 days; moderate or severe acute illness/infection (according to investigator judgment) on the day of vaccination or febrile illness (temperature  $\geq 38.0^{\circ}\text{C}$  [ $\geq 100.4^{\circ}\text{F}$ ]). A prospective participant should not be included in the trial until the condition has resolved or the febrile event has subsided; receipt of any vaccine in the 30 days preceding or on the day of the first trial vaccination or planned receipt of any vaccine in the 30 days following the second trial vaccination except for influenza vaccination, which may be received at any time in relation to trial intervention; prior administration of a coronavirus vaccine (SARS-CoV-2, SARS-CoV, Middle East Respiratory Syndrome [MERS-CoV]); participation at the time of trial enrollment (or in the 30 days preceding the first trial vaccination) or planned participation during the present trial period in another clinical trial investigating a vaccine, drug, medical device, or medical procedure.

To allow evaluation of vaccine performance in high-risk groups, individuals with pre-existing medical conditions (including controlled HIV infection, Hepatitis B and Hepatitis C), those who were immunocompromised (except those who had received solid-organ or bone marrow transplant in the past 180 days or chemotherapy in the past 90 days), and those with a potentially increased risk for severe COVID-19 were eligible for participation in the study.

Conditions considered to be associated with an increased risk of severe COVID-19 (available at <https://www.cdc.gov/coronavirus/2019-ncov/need-extra-precautions/evidencetable.html>) include:

- cancer
- chronic kidney disease
- chronic obstructive pulmonary disease (COPD)
- immunocompromised state from solid organ transplant
- immunocompromised state from other causes (blood or bone marrow transplant, immune deficiencies, HIV, use of corticosteroids, or use of immunosuppressors)
- obesity (body mass index of 30 or higher)
- heart conditions such as heart failure
- coronary artery disease or cardiomyopathies
- sickle cell disease
- thalassemia
- type 1 or type 2 diabetes mellitus
- moderate-to-severe asthma
- cerebrovascular disease
- cystic fibrosis
- hypertension/high blood pressure
- neurologic conditions
- hepatic disease
- pulmonary fibrosis
- smoking

## Methods 2. Determination of SARS-CoV-2 naïve or non-naïve status for immunogenicity assessment

| Status           | S-ELECSYS | N-ELECSYS         | NAAT              | Test result                      |
|------------------|-----------|-------------------|-------------------|----------------------------------|
| Naïve D1+D22     | Neg at D1 | Neg at D1 AND D22 | Neg at D1 AND D22 | All negative at D1 and D22       |
| Naïve D1         | Neg at D1 | Neg at D1         | Neg at D1         | All negative at D1               |
| Non-Naïve D1/D22 | Pos at D1 | Pos at D1 OR D22  | Pos at D1 OR D22  | Any positive result at D1 or D22 |
| Non-Naïve D1     | Pos at D1 | Pos at D1         | Pos at D1         | Any positive result at D1        |

SARS-CoV-2 naïve or non-naïve status was determined for all participants on serological samples using ELECSYS electrochemiluminescence immunoassays for anti-SARS-CoV-2 anti-S (S-ELECSYS; Elecsys Anti-SARS-CoV-2 S, Roche, Indianapolis, IN, USA) on D1 only and anti-nucleocapsid (N) (N-ELECSYS; Elecsys Anti-SARS-CoV-2 N, Roche) on D1 and D22, and on nasopharyngeal swabs using nucleic acid amplification tests (NAAT; Abbott RealTime SARS-CoV-2 assay, Abbott Molecular Inc., Des Plaines, IL, USA) on D1 and D22, following the manufacturer's instructions. SARS-CoV-2 naïve participants at D1 and D22 (naïve D1+D22) were those who tested negative for S-ELECSYS at D1 and negative for both N-ELECSYS and NAAT at both timepoints; the non-naïve subset of participants tested positive for at least one of the three tests at D1 and/or D22 (non-naïve D1/D22)

### **Methods 3. Measurement of SARS-CoV-2 neutralising antibody titres using a pseudovirus neutralisation assay**

SARS-CoV-2 neutralising antibody (NAb) titres against the D614G variant and the Beta (B.1.351) variant were measured using a pseudovirus neutralisation (PsVN) assay performed at Monogram Biosciences LabCorp (South San Francisco, CA, USA). Pseudoviruses were prepared by co-transfecting HEK293 producer cells with an HIV-1 genomic vector and a SARS CoV-2 envelope expression vector. NAb activity was measured by assessing the inhibition of luciferase activity in HEK293 target cells expressing the ACE2 receptor following pre-incubation of the pseudovirions with serial dilutions of the serum specimen. The expression of luciferase activity in target cells is inhibited in the presence of anti- SARS-CoV-2 NAb. Data were displayed by plotting the percent inhibition of luciferase activity versus the log<sub>10</sub> reciprocal of the serum/plasma dilution and NAb titers were reported as the reciprocal of the serum dilution conferring 50% inhibition (ID<sub>50</sub>) of pseudovirus infection. To ensure that the measured NAb activity was SARS-CoV-2 specific, each test specimen was also assessed using a non-specific pseudovirus (specificity control) that expresses a non-reactive envelope protein of one or more unrelated viruses.

**Table S1. Participant demographic characteristics, by age group (safety analysis set)**

|                                           | 18–59 years              |                              |                            | ≥ 60 years               |                              |                            |
|-------------------------------------------|--------------------------|------------------------------|----------------------------|--------------------------|------------------------------|----------------------------|
|                                           | Low-dose (5 µg)<br>n=121 | Medium-dose (10 µg)<br>n=120 | High-dose (15 µg)<br>n=119 | Low-dose (5 µg)<br>n=119 | Medium-dose (10 µg)<br>n=120 | High-dose (15 µg)<br>n=122 |
| <b>Sex</b>                                |                          |                              |                            |                          |                              |                            |
| Male                                      | 56 (46·3)                | 65 (54·2)                    | 68 (57·1)                  | 61 (51·3)                | 61 (50·8)                    | 51 (41·8)                  |
| Female                                    | 65 (53·7)                | 55 (45·8)                    | 51 (42·9)                  | 58 (48·7)                | 59 (49·2)                    | 71 (58·2)                  |
| <b>Age, years</b>                         |                          |                              |                            |                          |                              |                            |
| Mean (SD)                                 | 41·8 (11·4)              | 41·8 (11·7)                  | 40·3 (12·2)                | 66·0 (6·7)               | 65·1 (5·6)                   | 65·6 (6·1)                 |
| Range                                     | 20·0; 59·0               | 18·0; 59·0                   | 19·0; 59·0                 | 60·0; 92·0               | 60·0; 88·0                   | 60·0; 95·0                 |
| <b>BMI, kg/m<sup>2</sup></b>              |                          |                              |                            |                          |                              |                            |
| Mean (SD)                                 | 27·6 (5·8)               | 28·2 (6·2)                   | 28·4 (6·6)                 | 29·2 (5·4)               | 29·5 (5·6)                   | 29·0 (5·4)                 |
| <b>Country</b>                            |                          |                              |                            |                          |                              |                            |
| United States                             | 112 (92·6)               | 113 (94·2)                   | 109 (91·6)                 | 80 (67·2)                | 80 (66·7)                    | 87 (71·3)                  |
| Honduras                                  | 9 (7·4)                  | 7 (5·8)                      | 10 (8·4)                   | 39 (32·8)                | 40 (33·3)                    | 35 (28·7)                  |
| <b>Race</b>                               |                          |                              |                            |                          |                              |                            |
| White                                     | 85 (70·2)                | 82 (68·3)                    | 80 (67·2)                  | 71 (59·7)                | 68 (56·7)                    | 75 (61·5)                  |
| American Indian or Alaska Native          | 3 (2·5)                  | 7 (5·8)                      | 8 (6·7)                    | 19 (16·0)                | 17 (14·2)                    | 12 (9·8)                   |
| Black or African American                 | 10 (8·3)                 | 17 (14·2)                    | 10 (8·4)                   | 3 (2·5)                  | 6 (5·0)                      | 10 (8·2)                   |
| Asian                                     | 10 (8·3)                 | 8 (6·7)                      | 8 (6·7)                    | 3 (2·5)                  | 2 (1·7)                      | 2 (1·6)                    |
| Native Hawaiian or other Pacific Islander | 1 (0·8)                  | 1 (0·8)                      | 2 (1·7)                    | 1 (0·8)                  | 0                            | 0                          |
| Multiple                                  | 2 (1·7)                  | 0                            | 4 (3·4)                    | 3 (2·5)                  | 2 (1·7)                      | 0                          |
| Not reported                              | 3 (2·5)                  | 3 (2·5)                      | 2 (1·7)                    | 1 (0·8)                  | 1 (0·8)                      | 0                          |
| Unknown                                   | 7 (5·8)                  | 2 (1·7)                      | 5 (4·2)                    | 18 (15·1)                | 24 (20·0)                    | 23 (18·9)                  |
| <b>Ethnicity</b>                          |                          |                              |                            |                          |                              |                            |
| Hispanic or Latino                        | 25 (20·7)                | 25 (20·8)                    | 28 (23·5)                  | 43 (36·1)                | 43 (35·8)                    | 39 (32·0)                  |



|                                                      |            |            |            |            |            |            |
|------------------------------------------------------|------------|------------|------------|------------|------------|------------|
| Not Hispanic or Latino                               | 95 (78.5)  | 95 (79.2)  | 91 (76.5)  | 75 (63.0)  | 77 (64.2)  | 82 (67.2)  |
| Not reported or unknown                              | 1 (0.8)    | 0          | 0          | 1 (0.8)    | 0          | 1 (0.8)    |
| <b>Baseline SARS-CoV-2 rapid serodiagnostic test</b> |            |            |            |            |            |            |
| Negative                                             | 109 (90.1) | 108 (90.0) | 108 (90.8) | 110 (92.4) | 110 (91.7) | 111 (91.0) |
| Positive                                             | 12 (9.9)   | 12 (10.0)  | 11 (9.2)   | 9 (7.6)    | 10 (8.3)   | 11 (9.0)   |

---

**Table S2. High-risk medical conditions of study participants (full analysis set)**

|                                                                       | <b>Low-dose<br/>(N=240)<br/>n (%)</b> | <b>Medium-dose<br/>(N=239)<br/>n (%)</b> | <b>High-dose<br/>(N=242)<br/>n (%)</b> |
|-----------------------------------------------------------------------|---------------------------------------|------------------------------------------|----------------------------------------|
| At least one high-risk medical condition*                             | 151 (62.9)                            | 143 (59.8)                               | 143 (59.1)                             |
| Obesity <sup>†</sup>                                                  | 80 (33.3)                             | 92 (38.5)                                | 87 (36.0)                              |
| Hypertension                                                          | 84 (35.0)                             | 80 (33.5)                                | 75 (31.0)                              |
| Type 2 diabetes                                                       | 32 (13.3)                             | 26 (10.9)                                | 28 (11.6)                              |
| Smoking                                                               | 21 (8.8)                              | 15 (6.3)                                 | 19 (7.9)                               |
| Cancer                                                                | 15 (6.3)                              | 15 (6.3)                                 | 12 (5.0)                               |
| Moderate-to-severe asthma                                             | 8 (3.3)                               | 8 (3.3)                                  | 13 (5.4)                               |
| Heart Conditions                                                      | 9 (3.8)                               | 5 (2.1)                                  | 7 (2.9)                                |
| Coronary artery disease or cardiomyopathies                           | 8 (3.3)                               | 4 (1.7)                                  | 6 (2.5)                                |
| Immunocompromised state from causes other than solid organ transplant | 4 (1.7)                               | 5 (2.1)                                  | 6 (2.5)                                |
| Chronic obstructive pulmonary disease                                 | 6 (2.5)                               | 2 (0.8)                                  | 4 (1.7)                                |
| Hepatic disease                                                       | 4 (1.7)                               | 5 (2.1)                                  | 2 (0.8)                                |
| Cerebrovascular disease                                               | 2 (0.8)                               | 5 (2.1)                                  | 2 (0.8)                                |
| Neurologic conditions                                                 | 1 (0.4)                               | 1 (0.4)                                  | 4 (1.7)                                |
| Chronic kidney disease                                                | 0                                     | 0                                        | 4 (1.7)                                |
| Cystic fibrosis                                                       | 2 (0.8)                               | 1 (0.4)                                  | 0                                      |
| Immunocompromised state from solid organ transplant                   | 1 (0.4)                               | 0                                        | 1 (0.4)                                |
| Type 1 diabetes                                                       | 0                                     | 1 (0.4)                                  | 1 (0.4)                                |
| Pulmonary fibrosis                                                    | 1 (0.4)                               | 0                                        | 0                                      |
| Thalassemia                                                           | 1 (0.4)                               | 0                                        | 0                                      |
| Sickle cell disease                                                   | 0                                     | 0                                        | 0                                      |

n: number of subjects fulfilling the item listed

\*High-risk conditions are those considered to be associated with an increased risk of severe COVID-19, as detailed at <https://www.cdc.gov/coronavirus/2019-ncov/science/science-briefs/underlying-evidence-table.html>; <sup>†</sup>Obesity: body mass index of 30 kg/m<sup>2</sup> or higher

**Table S3: Safety overview after any injection by age stratum (safety analysis set)**

|                                            | Low-dose<br>(N=240) |      |              | Medium-dose<br>(N=240) |      |              | High-dose<br>(N=241) |      |              |
|--------------------------------------------|---------------------|------|--------------|------------------------|------|--------------|----------------------|------|--------------|
|                                            | n/M                 | %    | (95% CI)     | n/M                    | %    | (95% CI)     | n/M                  | %    | (95% CI)     |
| <b>All ages</b>                            |                     |      |              |                        |      |              |                      |      |              |
| Immediate unsolicited AE                   | 2/240               | 0.8  | (0.1; 3.0)   | 1/240                  | 0.4  | (0; 2.3)     | 1/241                | 0.4  | (0; 2.3)     |
| Immediate unsolicited AR                   | 1/240               | 0.4  | (0; 2.3)     | 1/240                  | 0.4  | (0; 2.3)     | 0/241                | 0    | (0; 1.5)     |
| <b>Up to 7 days after any vaccination</b>  |                     |      |              |                        |      |              |                      |      |              |
| Any solicited reaction                     | 217/238             | 91.2 | (86.8; 94.5) | 213/237                | 89.9 | (85.3; 93.4) | 218/239              | 91.2 | (86.9; 94.5) |
| Any grade 3 solicited reaction             | 52/238              | 21.8 | (16.8; 27.6) | 49/237                 | 20.7 | (15.7; 26.4) | 45/239               | 18.8 | (14.1; 24.4) |
| Solicited injection site reaction          | 201/238             | 84.5 | (79.2; 88.8) | 196/237                | 82.7 | (77.3; 87.3) | 200/239              | 83.7 | (78.4; 88.1) |
| Grade 3 injection site reaction            | 20/238              | 8.4  | (5.2; 12.7)  | 23/237                 | 9.7  | (6.3; 14.2)  | 17/239               | 7.1  | (4.2; 11.1)  |
| Solicited systemic reaction                | 191/238             | 80.3 | (74.6; 85.1) | 192/237                | 81.0 | (75.4; 85.8) | 185/239              | 77.4 | (71.6; 82.5) |
| Grade 3 systemic reaction                  | 45/238              | 18.9 | (14.1; 24.5) | 41/237                 | 17.3 | (12.7; 22.7) | 41/239               | 17.2 | (12.6; 22.5) |
| <b>Up to 21 days after any vaccination</b> |                     |      |              |                        |      |              |                      |      |              |
| Any unsolicited AE                         | 87/240              | 36.3 | (30.2; 42.7) | 79/240                 | 32.9 | (27.0; 39.3) | 89/241               | 36.9 | (30.8; 43.4) |
| Any unsolicited non-serious AE             | 87/240              | 36.3 | (30.2; 42.7) | 79/240                 | 32.9 | (27.0; 39.3) | 87/241               | 36.1 | (30.0; 42.5) |
| Any grade 3 unsolicited AE                 | 5/240               | 2.1  | (0.7; 4.8)   | 6/240                  | 2.5  | (0.9; 5.4)   | 19/241               | 7.9  | (4.8; 12.0)  |
| Any unsolicited AR                         | 47/240              | 19.6 | (14.8; 25.2) | 43/240                 | 17.9 | (13.3; 23.4) | 35/241               | 14.5 | (10.3; 19.6) |
| Any unsolicited non-serious AR             | 47/240              | 19.6 | (14.8; 25.2) | 43/240                 | 17.9 | (13.3; 23.4) | 35/241               | 14.5 | (10.3; 19.6) |
| Any grade 3 unsolicited AR                 | 1/240               | 0.4  | (0; 2.3)     | 3/240                  | 1.3  | (0.3; 3.6)   | 5/241                | 2.1  | (0.7; 4.8)   |
| Unsolicited non-serious injection site AR  | 13/240              | 5.4  | (2.9; 9.1)   | 18/240                 | 7.5  | (4.5; 11.6)  | 9/241                | 3.7  | (1.7; 7.0)   |
| Unsolicited non-serious systemic AE        | 80/240              | 33.3 | (27.4; 39.7) | 67/240                 | 27.9 | (22.3; 34.1) | 83/241               | 34.4 | (28.5; 40.8) |
| Unsolicited non-serious systemic AR        | 38/240              | 15.8 | (11.5; 21.1) | 29/240                 | 12.1 | (8.2; 16.9)  | 27/241               | 11.2 | (7.5; 15.9)  |
| <b>Up to D43*</b>                          |                     |      |              |                        |      |              |                      |      |              |
| AE leading to study discontinuation        | 0/240               | 0    | (0; 1.5)     | 0/240                  | 0    | (0; 1.5)     | 0/241                | 0    | (0; 1.5)     |
| SAE                                        | 0/240               | 0    | (0; 1.5)     | 2/240                  | 0.8  | (0.1; 3.0)   | 2/241                | 0.8  | (0.1; 3.0)   |
| Grade 3 SAE                                | 0/240               | 0    | (0; 1.5)     | 1/240                  | 0.4  | (0; 2.3)     | 1/241                | 0.4  | (0; 2.3)     |
| Related SAE                                | 0/240               | 0    | (0; 1.5)     | 0/240                  | 0    | (0; 1.5)     | 0/241                | 0    | (0; 1.5)     |
| Death                                      | 0/240               | 0    | (0; 1.5)     | 0/240                  | 0    | (0; 1.5)     | 0/241                | 0    | (0; 1.5)     |

|                                            |         |      |              |         |      |              |         |      |              |
|--------------------------------------------|---------|------|--------------|---------|------|--------------|---------|------|--------------|
| AESI                                       | 0/240   | 0    | (0; 1·5)     | 0/240   | 0    | (0; 1·5)     | 0/241   | 0    | (0; 1·5)     |
| MAAE                                       | 20/240  | 8·3  | (5·2; 12·6)  | 11/240  | 4·6  | (2·3; 8·1)   | 31/241  | 12·9 | (8·9; 17·8)  |
| <b>18-59 years</b>                         |         |      |              |         |      |              |         |      |              |
| Immediate unsolicited AE                   | 2/121   | 1·7  | (0·2; 5·8)   | 1/120   | 0·8  | (0; 4·6)     | 0/119   | 0    | (0; 3·1)     |
| Immediate unsolicited AR                   | 1/121   | 0·8  | (0; 4·5)     | 1/120   | 0·8  | (0; 4·6)     | 0/119   | 0    | (0; 3·1)     |
| <b>Up to 7 days after any vaccination</b>  |         |      |              |         |      |              |         |      |              |
| Any solicited reaction                     | 111/119 | 93·3 | (87·2; 97·1) | 110/119 | 92·4 | (86·1; 96·5) | 112/117 | 95·7 | (90·3; 98·6) |
| Any grade 3 solicited reaction             | 35/119  | 29·4 | (21·4; 38·5) | 34/119  | 28·6 | (20·7; 37·6) | 28/117  | 23·9 | (16·5; 32·7) |
| Solicited injection site reaction          | 107/119 | 89·9 | (83·0; 94·7) | 104/119 | 87·4 | (80·1; 92·8) | 109/117 | 93·2 | (87·0; 97·0) |
| Grade 3 injection site reaction            | 16/119  | 13·4 | (7·9; 20·9)  | 16/119  | 13·4 | (7·9; 20·9)  | 11/117  | 9·4  | (4·8; 16·2)  |
| Solicited systemic reaction                | 105/119 | 88·2 | (81·0; 93·4) | 103/119 | 86·6 | (79·1; 92·1) | 94/117  | 80·3 | (72·0; 87·1) |
| Grade 3 systemic reaction                  | 31/119  | 26·1 | (18·4; 34·9) | 30/119  | 25·2 | (17·7; 34·0) | 24/117  | 20·5 | (13·6; 29·0) |
| <b>Up to 21 days after any vaccination</b> |         |      |              |         |      |              |         |      |              |
| Any unsolicited AE                         | 50/121  | 41·3 | (32·4; 50·6) | 44/120  | 36·7 | (28·1; 45·9) | 44/119  | 37·0 | (28·3; 46·3) |
| Any unsolicited non-serious AE             | 50/121  | 41·3 | (32·4; 50·6) | 44/120  | 36·7 | (28·1; 45·9) | 43/119  | 36·1 | (27·5; 45·4) |
| Any grade 3 unsolicited AE                 | 1/121   | 0·8  | (0; 4·5)     | 3/120   | 2·5  | (0·5; 7·1)   | 9/119   | 7·6  | (3·5; 13·9)  |
| Any unsolicited AR                         | 30/121  | 24·8 | (17·4; 33·5) | 27/120  | 22·5 | (15·4; 31·0) | 17/119  | 14·3 | (8·5; 21·9)  |
| Any unsolicited non-serious AR             | 30/121  | 24·8 | (17·4; 33·5) | 27/120  | 22·5 | (15·4; 31·0) | 17/119  | 14·3 | (8·5; 21·9)  |
| Any grade 3 unsolicited AR                 | 0/121   | 0    | (0; 3·0)     | 2/120   | 1·7  | (0·2; 5·9)   | 1/119   | 0·8  | (0; 4·6)     |
| Unsolicited non-serious injection site AR  | 7/121   | 5·8  | (2·4; 11·6)  | 9/120   | 7·5  | (3·5; 13·8)  | 5/119   | 4·2  | (1·4; 9·5)   |
| Unsolicited non-serious systemic AE        | 46/121  | 38·0 | (29·3; 47·3) | 39/120  | 32·5 | (24·2; 41·7) | 42/119  | 35·3 | (26·8; 44·6) |
| Unsolicited non-serious systemic AR        | 25/121  | 20·7 | (13·8; 29·0) | 21/120  | 17·5 | (11·2; 25·5) | 12/119  | 10·1 | (5·3; 17·8)  |
| <b>Up to D43*</b>                          |         |      |              |         |      |              |         |      |              |
| AE leading to study discontinuation        | 0/121   | 0    | (0; 3·0)     | 0/120   | 0    | (0; 3·0)     | 0/119   | 0    | (0; 3·1)     |
| SAE                                        | 0/121   | 0    | (0; 3·0)     | 1/120   | 0·8  | (0; 4·6)     | 1/119   | 0·8  | (0; 4·6)     |
| Grade 3 SAE                                | 0/121   | 0    | (0; 3·0)     | 0/120   | 0    | (0; 3·0)     | 0/119   | 0    | (0; 3·1)     |
| Related SAE                                | 0/121   | 0    | (0; 3·0)     | 0/120   | 0    | (0; 3·0)     | 0/119   | 0    | (0; 3·1)     |
| Death                                      | 0/121   | 0    | (0; 3·0)     | 0/120   | 0    | (0; 3·0)     | 0/119   | 0    | (0; 3·1)     |
| AESI                                       | 0/121   | 0    | (0; 3·0)     | 0/120   | 0    | (0; 3·0)     | 0/119   | 0    | (0; 3·1)     |
| MAAE                                       | 9/121   | 7·4  | (3·5; 13·7)  | 5/120   | 4·2  | (1·4; 9·5)   | 15/119  | 12·6 | (7·2; 19·9)  |
| <b>≥60 years</b>                           |         |      |              |         |      |              |         |      |              |

|                                            |         |      |               |         |      |                |         |      |               |
|--------------------------------------------|---------|------|---------------|---------|------|----------------|---------|------|---------------|
| Immediate unsolicited AE                   | 0/119   | 0    | (0 ; 3·1)     | 0/120   | 0    | (0 ; 3·0)      | 1/122   | 0·8  | (0 ; 4·5)     |
| Immediate unsolicited AR                   | 0/119   | 0    | (0 ; 3·1)     | 0/120   | 0    | (0 ; 3·0)      | 0/122   | 0    | (0 ; 3·0)     |
| <b>Up to 7 days after any vaccination</b>  |         |      |               |         |      |                |         |      |               |
| Any solicited reaction                     | 106/119 | 89·1 | (82·0 ; 94·1) | 103/118 | 87·3 | (79·9 ; 92·7)  | 106/122 | 86·9 | (79·6 ; 92·3) |
| Any grade 3 solicited reaction             | 17/119  | 14·3 | (8·5 ; 21·9)  | 15/118  | 12·7 | (7·3 ; 20·1)   | 17/122  | 13·9 | (8·3 ; 21·4)  |
| Solicited injection site reaction          | 94/119  | 79·0 | (70·6 ; 85·9) | 92/118  | 78·0 | (69·4 ; 85·1)  | 91/122  | 74·6 | (65·9 ; 82·0) |
| Grade 3 injection site reaction            | 4/119   | 3·4  | (0·9 ; 8·4)   | 7/118   | 5·9  | (2·4 ; 11·8)   | 6/122   | 4·9  | (1·8 ; 10·4)  |
| Solicited systemic reaction                | 86/119  | 72·3 | (63·3 ; 80·1) | 89/118  | 75·4 | (66·6 ; 82·9)  | 91/122  | 74·6 | (65·9 ; 82·0) |
| Grade 3 systemic reaction                  | 14/119  | 11·8 | (6·6 ; 19·0)  | 11/118  | 9·3  | (4·7 ; 16·1)   | 17/122  | 13·9 | (8·3 ; 21·4)  |
| <b>Up to 21 days after any vaccination</b> |         |      |               |         |      |                |         |      |               |
| Any unsolicited AE                         | 37/119  | 31·1 | (22·9 ; 40·2) | 35/120  | 29·2 | (21·2 ; 38·2)  | 45/122  | 36·9 | (28·3 ; 46·1) |
| Any unsolicited non-serious AE             | 37/119  | 31·1 | (22·9 ; 40·2) | 35/120  | 29·2 | (21·2 ; 38·2)  | 44/122  | 36·1 | (27·6 ; 45·3) |
| Any grade 3 unsolicited AE                 | 4/119   | 3·4  | (0·9 ; 8·4)   | 3/120   | 2·5  | (0·5 ; 7·1)    | 10/122  | 8·2  | (4·0 ; 14·6)  |
| Any unsolicited AR                         | 17/119  | 14·3 | (8·5 ; 21·9)  | 16/120  | 13·3 | (7·8 ; 20·7)   | 18/122  | 14·8 | (9·0 ; 22·3)  |
| Any unsolicited non-serious AR             | 17/119  | 14·3 | (8·5 ; 21·9)  | 16/120  | 13·3 | (7·8 ; 20·7)   | 18/122  | 14·8 | (9·0 ; 22·3)  |
| Any grade 3 unsolicited AR                 | 1/119   | 0·8  | (0 ; 4·6)     | 1/120   | 0·8  | (0 ; 4·0)      | 4/122   | 3·3  | (0·9 ; 8·2)   |
| Unsolicited injection site AR              | 6/119   | 5·0  | (1·9 ; 10·7)  | 9/120   | 7·5  | (3·5 ; 13·8)   | 4/122   | 3·3  | (0·9 ; 8·2)   |
| Unsolicited systemic AE                    | 34/119  | 28·6 | (20·7 ; 37·6) | 28/120  | 23·3 | (16·1 ; 312·9) | 41/122  | 33·6 | (25·3 ; 42·7) |
| Unsolicited systemic AR                    | 13/119  | 10·9 | (5·9 ; 18·0)  | 8/120   | 6·7  | (2·9 ; 12·7)   | 15/122  | 12·3 | (7·0 ; 19·5)  |
| <b>Up to D43*</b>                          |         |      |               |         |      |                |         |      |               |
| AE leading to study discontinuation        | 0/119   | 0    | (0 ; 3·1)     | 0/120   | 0    | (0 ; 3·0)      | 0/122   | 0    | (0 ; 3·0)     |
| SAE                                        | 0/119   | 0    | (0 ; 3·1)     | 1/120   | 0·8  | (0 ; 4·6)      | 1/122   | 0·8  | (0 ; 4·5)     |
| Grade 3 SAE                                | 0/119   | 0    | (0 ; 3·1)     | 1/120   | 0·8  | (0 ; 4·6)      | 1/122   | 0·8  | (0 ; 4·5)     |
| Related SAE                                | 0/119   | 0    | (0 ; 3·1)     | 0/120   | 0    | (0 ; 3·0)      | 0/122   | 0    | (0 ; 3·0)     |
| Death                                      | 0/119   | 0    | (0 ; 3·1)     | 0/120   | 0    | (0 ; 3·0)      | 0/122   | 0    | (0 ; 3·0)     |
| AESI                                       | 0/119   | 0    | (0 ; 3·1)     | 0/120   | 0    | (0 ; 3·0)      | 0/122   | 0    | (0 ; 3·0)     |
| MAAE                                       | 11/119  | 9·2  | (4·7 ; 15·9)  | 6/120   | 5·0  | (1·9 ; 10·6)   | 16/122  | 13·1 | (7·7 ; 20·45) |

\*Includes events up to day 43, regardless of whether they were received after the first or second injection.

AE = adverse event. AESI = adverse event of special interest. AR = adverse reaction. n = number of participants experiencing the endpoint. M = number of participants with available data for the relevant endpoint. MAAE = medically-attended adverse event. SAE = serious adverse event.

Related SAEs: reported by an investigator as related to the vaccine. SAEs for which information on the relationship was missing, were considered as related

**Table S4. Most frequently reported unsolicited adverse reactions occurring up to 21 days after any vaccination (MedDRA preferred terms) (safety analysis set)**

|                            | Low-dose<br>(N=240) |       | Medium-dose<br>(N=240) |       | High-dose<br>(N=241) |       |
|----------------------------|---------------------|-------|------------------------|-------|----------------------|-------|
|                            | n/M                 | n ARs | n/M                    | n ARs | n/M                  | n ARs |
| <b>Fatigue</b>             | 17/240              | 18    | 8/240                  | 10    | 13/241               | 15    |
| <b>Nausea</b>              | 7/240               | 7     | 5/240                  | 5     | 2/241                | 2     |
| <b>Pruritus</b>            | 0/240               | 0     | 4/240                  | 5     | 0/241                | 0     |
| <b>Diarrhoea</b>           | 3/240               | 3     | 2/240                  | 2     | 1/241                | 1     |
| <b>Dizziness</b>           | 2/240               | 2     | 2/240                  | 2     | 3/241                | 3     |
| <b>Injection site rash</b> | 1/240               | 1     | 2/240                  | 2     | 1/241                | 1     |
| <b>Decreased appetite</b>  | 1/240               | 1     | 2/240                  | 2     | 0/241                | 0     |
| <b>Lymphadenopathy</b>     | 2/240               | 3     | 1/240                  | 1     | 3/241                | 3     |

n = number of participants reporting the specified event. M = number of participants with available data for the relevant endpoint. n ARs = number of adverse reactions. SafAS = safety analysis set.

Adverse reactions were recorded using MedDRA preferred terms.

**Table S5: Safety overview after any injection by SARS-CoV-2 positivity at baseline (D1) (safety analysis set)**

|                                               | Low-dose<br>(N=240) |      |               | Medium-dose<br>(N=240) |      |               | High-dose<br>(N=241) |      |               |
|-----------------------------------------------|---------------------|------|---------------|------------------------|------|---------------|----------------------|------|---------------|
|                                               | n/M                 | %    | (95% CI)      | n/M                    | %    | (95% CI)      | n/M                  | %    | (95% CI)      |
| <b>SARS-CoV-2 naïve at baseline (D1)*</b>     |                     |      |               |                        |      |               |                      |      |               |
| Immediate unsolicited AE                      | 2/211               | 0.9  | (0.1 ; 3.4)   | 1/210                  | 0.5  | (0 ; 2.6)     | 1/207                | 0.5  | (0 ; 2.7)     |
| Immediate unsolicited AR                      | 1/211               | 0.5  | (0 ; 2.6)     | 1/210                  | 0.5  | (0 ; 2.6)     | 0/207                | 0    | (0 ; 1.8)     |
| <i>Up to 7 days after any vaccination</i>     |                     |      |               |                        |      |               |                      |      |               |
| Any solicited reactions                       | 191/209             | 91.4 | (86.7 ; 94.8) | 189/208                | 90.9 | (86.1 ; 94.4) | 189/206              | 91.7 | (87.1 ; 95.1) |
| Solicited injection site reaction             | 177/209             | 84.7 | (79.1 ; 89.3) | 175/208                | 84.1 | (78.4 ; 88.8) | 173/206              | 84.0 | (78.2 ; 88.7) |
| Solicited systemic reaction                   | 171/209             | 81.8 | (75.9 ; 86.8) | 170/208                | 81.7 | (75.8 ; 86.7) | 161/206              | 78.2 | (71.9 ; 83.6) |
| <i>Up to 21 days after any vaccination</i>    |                     |      |               |                        |      |               |                      |      |               |
| Any unsolicited AEs                           | 81/211              | 38.4 | (31.8 ; 45.3) | 69/210                 | 32.9 | (26.5 ; 39.7) | 81/207               | 39.1 | (32.4 ; 46.1) |
| Any unsolicited ARs                           | 45/211              | 21.3 | (16.0 ; 27.5) | 37/210                 | 17.6 | (12.7 ; 23.5) | 34/207               | 16.4 | (11.7 ; 22.2) |
| Any unsolicited non-serious AE                | 81/211              | 38.4 | (31.8 ; 45.3) | 69/210                 | 32.9 | (26.5 ; 39.7) | 79/207               | 38.2 | (31.5 ; 45.2) |
| Any unsolicited non-serious AR                | 45/211              | 21.3 | (16.0 ; 27.5) | 37/210                 | 17.6 | (12.7 ; 23.5) | 34/207               | 16.4 | (11.7 ; 22.2) |
| Unsolicited non-serious injection site AR     | 12/211              | 5.7  | (3.0 ; 9.7)   | 16/210                 | 7.6  | (4.4 ; 12.1)  | 9/207                | 4.3  | (2.0 ; 8.1)   |
| Unsolicited non-serious systemic AE           | 75/211              | 35.5 | (29.1 ; 42.4) | 58/210                 | 27.6 | (21.7 ; 34.2) | 75/207               | 36.2 | (29.7 ; 43.2) |
| Unsolicited non-serious systemic AR           | 37/211              | 17.5 | (12.7 ; 23.4) | 25/210                 | 11.9 | (7.9 ; 17.1)  | 26/207               | 12.6 | (8.4 ; 17.9)  |
| <i>Up to D43‡</i>                             |                     |      |               |                        |      |               |                      |      |               |
| AE leading to study discontinuation           | 0/211               | 0    | (0 ; 1.7)     | 0/210                  | 0    | (0 ; 1.7)     | 0/207                | 0    | (0 ; 1.8)     |
| SAE                                           | 0/211               | 0    | (0 ; 1.7)     | 1/210                  | 0.5  | (0 ; 2.6)     | 2/207                | 1.0  | (0.1 ; 3.4)   |
| Related SAE                                   | 0/211               | 0    | (0 ; 1.7)     | 0/210                  | 0    | (0 ; 1.7)     | 0/207                | 0    | (0 ; 1.8)     |
| Death                                         | 0/211               | 0    | (0 ; 1.7)     | 0/210                  | 0    | (0 ; 1.7)     | 0/207                | 0    | (0 ; 1.8)     |
| AESI                                          | 0/211               | 0    | (0 ; 1.7)     | 0/210                  | 0    | (0 ; 1.7)     | 0/207                | 0    | (0 ; 1.8)     |
| MAAE                                          | 20/211              | 9.5  | (5.9 ; 14.3)  | 9/210                  | 4.3  | (2.0 ; 8.0)   | 28/207               | 13.5 | (9.2 ; 19.0)  |
| <b>SARS-CoV-2 non-naïve at baseline (D1)†</b> |                     |      |               |                        |      |               |                      |      |               |
| Immediate unsolicited AE                      | 0/26                | 0    | (0 ; 13.2)    | 0/28                   | 0    | (0 ; 12.3)    | 0/31                 | 0    | (0 ; 11.2)    |
| Immediate unsolicited AR                      | 0/26                | 0    | (0 ; 13.2)    | 0/28                   | 0    | (0 ; 12.3)    | 0/31                 | 0    | (0 ; 11.2)    |

*Up to 7 days after any vaccination*



|                                                   |       |      |               |       |      |               |       |      |               |
|---------------------------------------------------|-------|------|---------------|-------|------|---------------|-------|------|---------------|
| Any solicited reaction                            | 23/26 | 88.5 | (69.8 ; 97.6) | 22/27 | 81.5 | (61.9 ; 93.7) | 27/30 | 90.0 | (73.5 ; 97.9) |
| Solicited injection site reaction                 | 21/26 | 80.8 | (60.6 ; 93.4) | 20/27 | 74.1 | (53.7 ; 88.9) | 25/30 | 83.3 | (65.3 ; 94.4) |
| Solicited systemic reaction                       | 17/26 | 65.4 | (44.3 ; 82.8) | 20/27 | 74.1 | (53.7 ; 88.9) | 22/30 | 73.3 | (54.1 ; 87.7) |
| <b><i>Up to 21 days after any vaccination</i></b> |       |      |               |       |      |               |       |      |               |
| Any unsolicited AE                                | 4/26  | 15.4 | (4.4 ; 34.9)  | 10/28 | 35.7 | (18.6 ; 55.9) | 8/31  | 25.8 | (11.9 ; 44.6) |
| Any unsolicited AR                                | 1/26  | 3.8  | (0.1 ; 19.6)  | 6/28  | 21.4 | (8.3 ; 41.0)  | 1/31  | 3.2  | (0.1 ; 16.7)  |
| Any unsolicited non-serious AE                    | 4/26  | 15.4 | (4.4 ; 34.9)  | 10/28 | 35.7 | (18.6 ; 55.9) | 8/31  | 25.8 | (11.9 ; 44.6) |
| Any unsolicited non-serious AR                    | 1/26  | 3.8  | (0.1 ; 19.6)  | 6/28  | 21.4 | (8.3 ; 41.0)  | 1/31  | 3.2  | (0.1 ; 16.7)  |
| Unsolicited non-serious injection site AR         | 1/26  | 3.8  | (0.1 ; 19.6)  | 2/28  | 7.1  | (0.9 ; 23.5)  | 0/31  | 0    | (0 ; 11.2)    |
| Unsolicited non-serious systemic AE               | 3/26  | 11.5 | (2.4 ; 30.2)  | 9/28  | 32.1 | (15.9 ; 52.4) | 8/31  | 25.8 | (11.9 ; 44.6) |
| Unsolicited non-serious systemic AR               | 0/26  | 0    | (0 ; 13.2)    | 4/28  | 14.3 | (4.0 ; 32.7)  | 1/31  | 3.2  | (0.1 ; 16.7)  |
| <b><i>Up to D43<sup>‡</sup></i></b>               |       |      |               |       |      |               |       |      |               |
| AE leading to study discontinuation               | 0/26  | 0    | (0 ; 13.2)    | 0/28  | 0    | (0 ; 12.3)    | 0/31  | 0    | (0 ; 11.2)    |
| SAE                                               | 0/26  | 0    | (0 ; 13.2)    | 1/28  | 3.6  | (0.1 ; 18.3)  | 0/31  | 0    | (0 ; 11.2)    |
| Related SAE                                       | 0/26  | 0    | (0 ; 13.2)    | 0/28  | 0    | (0 ; 12.3)    | 0/31  | 0    | (0 ; 11.2)    |
| Death                                             | 0/26  | 0    | (0 ; 13.2)    | 0/28  | 0    | (0 ; 12.3)    | 0/31  | 0    | (0 ; 11.2)    |
| AESI                                              | 0/26  | 0    | (0 ; 13.2)    | 0/28  | 0    | (0 ; 12.3)    | 0/31  | 0    | (0 ; 11.2)    |
| MAAE                                              | 0/26  | 0    | (0 ; 13.2)    | 2/28  | 7.1  | (0.9 ; 23.5)  | 3/31  | 9.7  | (2.0 ; 25.8)  |

\*SARS-CoV-2 naïve at D1 i.e. tested negative for S-ELECSYS, N-ELECSYS, and NAAT on D1; †SARS-CoV-2 non-naïve at D1, i.e. tested positive for 1 or more of the tests on D1; ‡Includes events up to day 43, regardless of whether they were received after the first or second injection.

AE = adverse event. AESI = adverse event of special interest. AR = adverse reaction. n = number of participants experiencing the endpoint. M = number of participants with available data for the relevant endpoint. MAAE = medically-attended adverse event. SAE = serious adverse event.

Related SAEs: reported by an investigator as related to the vaccine. SAEs for which information on the relationship was missing, were considered as related .

**Table S6. Safety overview after any injection by presence of at least one high-risk medical condition at baseline (D1) (safety analysis set)**

|                                            | Low-dose<br>(N=240) |      |               | Medium-dose<br>(N=240) |      |               | High-dose<br>(N=241) |      |               |
|--------------------------------------------|---------------------|------|---------------|------------------------|------|---------------|----------------------|------|---------------|
|                                            | n/M                 | %    | (95% CI)      | n/M                    | %    | (95% CI)      | n/M                  | %    | (95% CI)      |
| <b>High-risk medical condition - yes</b>   |                     |      |               |                        |      |               |                      |      |               |
| Immediate unsolicited AE                   | 0/151               | 0    | (0 ; 2.4)     | 0/144                  | 0    | (0 ; 2.5)     | 1/142                | 0.7  | (0 ; 3.9)     |
| Immediate unsolicited AR                   | 0/151               | 0    | (0 ; 2.4)     | 0/144                  | 0    | (0 ; 2.5)     | 0/142                | 0    | (0 ; 2.6)     |
| <i>Up to 7 days after any vaccination</i>  |                     |      |               |                        |      |               |                      |      |               |
| Any solicited reactions                    |                     | 88.0 | (81.7 ; 92.7) | 125/143                | 87.4 | (80.8 ; 92.4) | 122/140              | 87.1 | (80.4 ; 92.2) |
| Solicited injection site reaction          | 117/150             | 78.0 | (70.5 ; 84.3) | 111/143                | 77.6 | (69.9 ; 84.2) | 107/140              | 76.4 | (68.5 ; 83.2) |
| Solicited systemic reaction                | 111/150             | 74.0 | (66.2 ; 80.8) | 110/143                | 76.9 | (69.1 ; 83.6) | 103/140              | 73.6 | (65.5 ; 80.7) |
| <i>Up to 21 days after any vaccination</i> |                     |      |               |                        |      |               |                      |      |               |
| Any unsolicited AEs                        | 43/151              | 28.5 | (21.4 ; 36.4) | 42/144                 | 29.2 | (21.9 ; 37.3) | 44/142               | 31.0 | (23.5 ; 39.3) |
| Any unsolicited ARs                        | 22/151              | 14.6 | (9.4 ; 21.2)  | 19/144                 | 13.2 | (8.1 ; 19.8)  | 15/142               | 10.6 | (6.0 ; 16.8)  |
| Any unsolicited non-serious AE             | 43/151              | 28.5 | (21.4 ; 36.4) | 42/144                 | 29.2 | (21.9 ; 37.3) | 42/142               | 29.6 | (22.2 ; 37.8) |
| Any unsolicited non-serious AR             | 22/151              | 14.6 | (9.4 ; 21.2)  | 19/144                 | 13.2 | (8.1 ; 19.8)  | 15/142               | 10.6 | (6.0 ; 16.8)  |
| Unsolicited non-serious injection site AR  | 8/151               | 5.3  | (2.3 ; 10.2)  | 5/144                  | 3.5  | (1.1 ; 7.9)   | 5/142                | 3.5  | (1.2 ; 8.0)   |
| Unsolicited non-serious systemic AE        | 38/151              | 25.2 | (18.5 ; 32.9) | 39/144                 | 27.1 | (20.0 ; 35.1) | 39/142               | 27.5 | (20.3 ; 35.6) |
| Unsolicited non-serious systemic AR        | 16/151              | 10.6 | (6.2 ; 16.6)  | 16/144                 | 11.1 | (6.5 ; 17.4)  | 10/142               | 7.0  | (3.4 ; 12.6)  |
| <i>Up to D43<sup>‡</sup></i>               |                     |      |               |                        |      |               |                      |      |               |
| AE leading to study discontinuation        | 0/151               | 0    | (0 ; 2.4)     | 0/144                  | 0    | (0 ; 2.5)     | 0/142                | 0    | (0 ; 2.6)     |
| SAE                                        | 0/151               | 0    | (0 ; 2.4)     | 2/144                  | 1.4  | (0.2 ; 4.9)   | 2/142                | 1.4  | (0.2 ; 5.0)   |
| Related SAE                                | 0/151               | 0    | (0 ; 2.4)     | 0/144                  | 0    | (0 ; 2.5)     | 0/142                | 0    | (0 ; 2.6)     |
| Death                                      | 0/151               | 0    | (0 ; 2.4)     | 0/144                  | 0    | (0 ; 2.5)     | 0/142                | 0    | (0 ; 2.6)     |
| AESI                                       | 0/151               | 0    | (0 ; 2.4)     | 0/144                  | 0    | (0 ; 2.5)     | 0/142                | 0    | (0 ; 2.6)     |
| MAAE                                       | 14/151              | 9.3  | (5.2 ; 15.1)  | 7/144                  | 4.9  | (2.0 ; 9.8)   | 18/142               | 12.7 | (7.7 ; 19.3)  |
| <b>High-risk medical condition - no</b>    |                     |      |               |                        |      |               |                      |      |               |
| Immediate unsolicited AE                   | 2/89                | 2.2  | (0.3 ; 7.9)   | 1/96                   | 1.0  | (0 ; 5.7)     | 0/99                 | 0    | (0 ; 3.7)     |
| Immediate unsolicited AR                   | 1/89                | 1.1  | (0 ; 6.1)     | 1/96                   | 1.0  | (0 ; 5.7)     | 0/99                 | 0    | (0 ; 3.7)     |

*Up to 7 days after any vaccination*

|                                                   |       |      |               |       |      |               |       |      |               |
|---------------------------------------------------|-------|------|---------------|-------|------|---------------|-------|------|---------------|
| Any solicited reactions                           | 85/88 | 96.6 | (90.4 ; 99.3) | 88/94 | 93.6 | (86.6 ; 97.6) | 96/99 | 97.0 | (91.4 ; 99.4) |
| Solicited injection site reaction                 | 84/88 | 95.5 | (88.8 ; 98.7) | 85/94 | 90.4 | (82.6 ; 95.5) | 93/99 | 93.9 | (87.3 ; 97.7) |
| Solicited systemic reaction                       | 80/88 | 90.9 | (82.9 ; 96.0) | 82/94 | 87.2 | (78.8 ; 93.2) | 82/99 | 82.8 | (73.9 ; 89.7) |
| <b><i>Up to 21 days after any vaccination</i></b> |       |      |               |       |      |               |       |      |               |
| Any unsolicited AEs                               | 44/89 | 49.4 | (38.7 ; 60.2) | 37/96 | 38.5 | (28.8 ; 49.0) | 45/99 | 45.5 | (35.4 ; 55.8) |
| Any unsolicited ARs                               | 25/89 | 28.1 | (19.1 ; 38.6) | 24/96 | 25.0 | (16.7 ; 34.9) | 20/99 | 20.2 | (12.8 ; 29.5) |
| Any unsolicited non-serious AE                    | 44/89 | 49.4 | (38.7 ; 60.2) | 37/96 | 38.5 | (28.8 ; 49.0) | 45/99 | 45.5 | (35.4 ; 55.8) |
| Any unsolicited non-serious AR                    | 25/89 | 28.1 | (19.1 ; 38.6) | 24/96 | 25.0 | (16.7 ; 34.9) | 20/99 | 20.2 | (12.8 ; 29.5) |
| Unsolicited non-serious injection site AR         | 5/89  | 5.6  | (1.8 ; 12.6)  | 13/96 | 13.5 | (7.4 ; 22.0)  | 4/99  | 4.0  | (1.1 ; 10.0)  |
| Unsolicited non-serious systemic AE               | 42/89 | 47.2 | (36.5 ; 58.1) | 28/96 | 29.2 | (20.3 ; 39.3) | 44/99 | 44.4 | (34.5 ; 54.8) |
| Unsolicited non-serious systemic AR               | 22/89 | 24.7 | (16.2 ; 35.0) | 13/96 | 13.5 | (7.4 ; 22.0)  | 17/99 | 17.2 | (10.3 ; 26.1) |
| <b><i>Up to D43<sup>2</sup></i></b>               |       |      |               |       |      |               |       |      |               |
| AE leading to study discontinuation               | 0/89  | 0    | (0 ; 4.1)     | 0/96  | 0    | (0 ; 3.8)     | 0/99  | 0    | (0 ; 3.7)     |
| SAE                                               | 0/89  | 0    | (0 ; 4.1)     | 0/96  | 0    | (0 ; 3.8)     | 0/99  | 0    | (0 ; 3.7)     |
| Related SAE                                       | 0/89  | 0    | (0 ; 4.1)     | 0/96  | 0    | (0 ; 3.8)     | 0/99  | 0    | (0 ; 3.7)     |
| Death                                             | 0/89  | 0    | (0 ; 4.1)     | 0/96  | 0    | (0 ; 3.8)     | 0/99  | 0    | (0 ; 3.7)     |
| AESI                                              | 0/89  | 0    | (0 ; 4.1)     | 0/96  | 0    | (0 ; 3.8)     | 0/99  | 0    | (0 ; 3.7)     |
| MAAE                                              | 6/89  | 6.7  | (2.5 ; 14.1)  | 4/96  | 4.2  | (1.1 ; 10.3)  | 13/99 | 13.1 | (7.2 ; 21.4)  |

AE = adverse event. AESI = adverse event of special interest. AR = adverse reaction. n = number of participants experiencing the endpoint. M = number of participants with available data for the relevant endpoint. MAAE = medically-attended adverse event. SAE = serious adverse event.

Related SAEs: reported by an investigator as related to the vaccine. SAEs for which information on the relationship was missing, were considered as related

**Table S7: Neutralising antibody responses to D614G after the first injection (day 22), by age group (PPAS naïve D1+D22)**

|                    | Low-dose (5 µg)<br>(N=201) |                           | Medium-dose (10 µg)<br>(N=207) |                           | High-dose (15 µg)<br>(N=203) |                           |
|--------------------|----------------------------|---------------------------|--------------------------------|---------------------------|------------------------------|---------------------------|
|                    | n/M or M                   | % or GMT/GMTR<br>(95% CI) | n/M or M                       | % or GMT/GMTR<br>(95% CI) | n/M or M                     | % or GMT/GMTR<br>(95% CI) |
| <b>Day 22</b>      |                            |                           |                                |                           |                              |                           |
| <b>All ages</b>    |                            |                           |                                |                           |                              |                           |
| ≥2-fold rise       | 35/155                     | 22.6 (16.3 ; 30.0)        | 44/161                         | 27.3 (20.6 ; 34.9)        | 51/155                       | 32.9 (25.6 ; 40.9)        |
| ≥4-fold rise       | 28/155                     | 18.1 (12.4 ; 25.0)        | 36/161                         | 22.4 (16.2 ; 29.6)        | 42/155                       | 27.1 (20.3 ; 34.8)        |
| GMT                | 155                        | 36.6 (29.7 ; 45.1)        | 161                            | 39.5 (32.2 ; 48.4)        | 156                          | 45.4 (36.8 ; 56.2)        |
| GMTR               | 155                        | 1.83 (1.49 ; 2.25)        | 161                            | 1.97 (1.61 ; 2.42)        | 155                          | 2.28 (1.85 ; 2.83)        |
| <b>18–59 years</b> |                            |                           |                                |                           |                              |                           |
| ≥2-fold rise       | 19/74                      | 25.7 (16.2 ; 37.2)        | 29/72                          | 40.3 (28.9 ; 52.5)        | 35/74                        | 47.3 (35.6 ; 59.3)        |
| ≥4-fold rise       | 14/74                      | 18.9 (10.7 ; 29.7)        | 24/72                          | 33.3 (22.7 ; 45.4)        | 30/74                        | 40.5 (29.3 ; 52.6)        |
| GMT                | 74                         | 36.9 (27.7 ; 49.2)        | 72                             | 52.2 (37.8 ; 72.1)        | 75                           | 68.7 (48.3 ; 97.8)        |
| GMTR               | 74                         | 1.85 (1.39 ; 2.46)        | 72                             | 2.61 (1.89 ; 3.61)        | 74                           | 3.49 (2.45 ; 4.99)        |
| <b>≥60 years</b>   |                            |                           |                                |                           |                              |                           |
| ≥2-fold rise       | 16/81                      | 19.8 (11.7 ; 30.1)        | 15/89                          | 16.9 (9.8 ; 26.3)         | 16/81                        | 19.8 (11.7 ; 30.1)        |
| ≥4-fold rise       | 14/81                      | 17.3 (9.8 ; 27.3)         | 12/89                          | 13.5 (7.2 ; 22.4)         | 12/81                        | 14.8 (7.9 ; 24.4)         |
| GMT                | 81                         | 36.3 (26.7 ; 49.2)        | 89                             | 31.5 (24.4 ; 40.6)        | 81                           | 31.0 (24.9 ; 38.6)        |
| GMTR               | 81                         | 1.81 (1.34 ; 2.46)        | 89                             | 1.57 (1.22 ; 2.03)        | 81                           | 1.55 (1.24 ; 1.93)        |

**Table S8. D614G neutralising antibody response after two injections in naïve participants by presence of high-risk medical condition (PPAS-naïve D1+D22)**

|                                              | Low-dose<br>N=168 |                   | Medium-dose<br>N=177 |                   | High-dose<br>N=176 |                   |
|----------------------------------------------|-------------------|-------------------|----------------------|-------------------|--------------------|-------------------|
|                                              | M                 | GMT (95% CI)      | M                    | GMT (95% CI)      | M                  | GMT (95% CI)      |
| <b>Overall</b>                               | 165               | 2189 (1744, 2746) | 173                  | 2269 (1792, 2873) | 172                | 2895 (2294, 3654) |
| <i>With a high-risk medical condition</i>    |                   |                   |                      |                   |                    |                   |
| <b>All ages</b>                              | 99                | 2085 (1514, 2872) | 104                  | 2023 (1480, 2764) | 98                 | 2033 (1490, 2775) |
| 18-59 years                                  | 34                | 3241 (2127, 4938) | 37                   | 3830 (2234, 6566) | 32                 | 4678 (2903, 7537) |
| ≥60 years                                    | 65                | 1655 (1074, 2550) | 67                   | 1422 (987, 2048)  | 66                 | 1358 (939, 1962)  |
| <i>Without a high-risk medical condition</i> |                   |                   |                      |                   |                    |                   |
| <b>All ages</b>                              | 66                | 2354 (1725, 3213) | 69                   | 2699 (1875, 3884) | 74                 | 4622 (3323, 6428) |
| 18-59 years                                  | 48                | 2766 (1956, 3912) | 44                   | 4056 (2680, 6136) | 49                 | 5469 (3651, 8193) |
| ≥60 years                                    | 18                | 1532 (770, 3045)  | 25                   | 1317 (700, 2478)  | 25                 | 3323 (1844, 5987) |

M = number of participants with available data for the relevant endpoint.

**Table S9. D614G binding antibody profile at D36, overall, by age and by SARS-CoV-2 naïve status (PPAS)**

| Endpoint                     | Low-dose (5 µg)<br>(N=201) |                           | Medium-dose (10 µg)<br>(N=207) |                           | High-dose (15 µg)<br>(N=203) |                           |
|------------------------------|----------------------------|---------------------------|--------------------------------|---------------------------|------------------------------|---------------------------|
|                              | n/M or M                   | % or GMC/GMCR<br>(95% CI) | n/M or M                       | % or GMC/GMCR<br>(95% CI) | n/M or M                     | % or GMC/GMCR<br>(95% CI) |
| <b>PPAS-naïve D1+D22</b>     |                            |                           |                                |                           |                              |                           |
| <b>All ages</b>              |                            |                           |                                |                           |                              |                           |
| ≥2-fold rise (responders)*   | 153/153                    | 100 (97.6, 100)           | 164/165                        | 99.4 (96.7, 100)          | 158/159                      | 99.4 (96.5, 100)          |
| ≥4-fold rise                 | 161/162                    | 99.4 (96.6, 100)          | 170/171                        | 99.4 (96.8, 100)          | 170/171                      | 99.4 (96.8, 100)          |
| GMCs                         | 168                        | 15503 (13040, 18431)      | 177                            | 17188 (14560, 20289)      | 176                          | 17872 (14957, 21355)      |
| GMCR                         | 162                        | 1463 (1224, 1748)         | 171                            | 1692 (1422, 2014)         | 171                          | 1733 (1437, 2090)         |
| <b>18–59 years</b>           |                            |                           |                                |                           |                              |                           |
| ≥2-fold rise (responders)*   | 74/74                      | 100 (95.1, 100)           | 75/75                          | 100 (95.2, 100)           | 78/78                        | 100 (95.4, 100)           |
| ≥4-fold rise                 | 79/79                      | 100 (95.4, 100)           | 78/78                          | 100 (95.4, 100)           | 81/81                        | 100 (95.5, 100)           |
| GMCs                         | 83                         | 21739 (18095; 26116)      | 82                             | 25448 (20980, 30867)      | 81                           | 26549 (22179, 31779)      |
| GMCR                         | 79                         | 1950 (1595, 2384)         | 78                             | 2427 (1953, 3016)         | 81                           | 2684 (2231, 3230)         |
| <b>≥60 years</b>             |                            |                           |                                |                           |                              |                           |
| ≥2-fold rise (responders)*   | 79/79                      | 100 (95.4, 100)           | 89/90                          | 98.9 (94.0, 100)          | 80/81                        | 98.8 (93.3, 100)          |
| ≥4-fold rise                 | 82/83                      | 98.8 (93.5, 100)          | 92/93                          | 98.9 (94.2; 100)          | 89/90                        | 98.9 (94.0, 100)          |
| GMCs                         | 85                         | 11144 (8446, 14705)       | 95                             | 12249 (9604, 15623)       | 95                           | 12753 (9664, 16830)       |
| GMCR                         | 83                         | 1112 (839, 1475)          | 93                             | 1251 (974, 1606)          | 90                           | 1169 (870, 1570)          |
| <b>PPAS non-naïve D1/D22</b> |                            |                           |                                |                           |                              |                           |
| <b>All ages</b>              |                            |                           |                                |                           |                              |                           |
| ≥2-fold rise                 | 28/28                      | 100 (87.7, 100)           | 24/26                          | 92.3 (74.9, 99.1)         | 23/23                        | 100 (85.2, 100)           |
| ≥4-fold rise (responders)*   | 28/28                      | 100 (87.7, 100)           | 24/26                          | 92.3 (74.9, 99.1)         | 23/23                        | 100 (85.2, 100)           |
| GMCs                         | 28                         | 27565 (19544, 38879)      | 26                             | 26293 (17728, 38996)      | 23                           | 48699 (31012, 76475)      |

|                            |       |                      |       |                      |       |                        |
|----------------------------|-------|----------------------|-------|----------------------|-------|------------------------|
| GMCR                       | 28    | 131 (56.4, 303)      | 26    | 111 (45.5, 271)      | 23    | 284 (134, 603)         |
| <b>18–59 years</b>         |       |                      |       |                      |       |                        |
| ≥2-fold rise               | 13/13 | 100 (75.3, 100)      | 14/16 | 87.5 (61.7, 98.4)    | 14/14 | 100 (76.8, 100)        |
| ≥4-fold rise (responders)* | 13/13 | 100 (75.3, 100)      | 14/16 | 87.5 (61.7, 98.4)    | 14/14 | 100 (76.8, 100)        |
| GMCs                       | 13    | 34939 (20779, 58748) | 16    | 32578 (21327, 49766) | 14    | 50322 (25193, 101 000) |
| GMCR                       | 13    | 195 (51.9, 732)      | 16    | 96.3 (27.8, 334)     | 14    | 371 (179, 769)         |
| <b>≥60 years</b>           |       |                      |       |                      |       |                        |
| ≥2-fold rise               | 15/15 | 100 (78.2, 100)      | 10/10 | 100 (69.2, 100)      | 9/9   | 100 (66.4, 100)        |
| ≥4-fold rise (responders)* | 15/15 | 100 (78.2, 100)      | 10/10 | 100 (69.2, 100)      | 9/9   | 100 (66.4, 100)        |
| GMCs                       | 15    | 22446 (13739, 36671) | 10    | 18660 (8054, 43229)  | 9     | 46277 (24818, 86291)   |
| GMCR                       | 15    | 92.4 (27.9 ; 306)    | 10    | 139 (31.3 ; 621)     | 9     | 187 (31.2 ; 1124)      |

CI = confidence interval. GMC = geometric mean concentration. GMCR = geometric mean concentration ratio. LLOQ = lower limit of quantification. n = number of participants experiencing the endpoint. M = number of participants with available data for the relevant endpoint. PPAS = per protocol analysis set.

\*Responders were defined in the naive participant subset as those who had ≥2-fold rise in antibody titres from baseline to D36 and in the non-naïve subset as those who had ≥4-fold rise in antibody titres from baseline to D36.



**Table S10: Neutralising antibody responses to D614G after the first (day 22) and second (day 36) injections, by age group (PPAS non-naïve D1/D22)**

|                    | Low-dose (5 µg)<br>(N=201) |                           | Medium-dose (10 µg)<br>(N=207) |                           | High-dose (15 µg)<br>(N=203) |                           |
|--------------------|----------------------------|---------------------------|--------------------------------|---------------------------|------------------------------|---------------------------|
|                    | n/M or M                   | % or GMT/GMTR<br>(95% CI) | n/M or M                       | % or GMT/GMTR<br>(95% CI) | n/M or M                     | % or GMT/GMTR<br>(95% CI) |
| <b>Day 22</b>      |                            |                           |                                |                           |                              |                           |
| <b>All ages</b>    |                            |                           |                                |                           |                              |                           |
| ≥2-fold rise       | 20/27                      | 74.1 (53.7 ; 88.9)        | 13/22                          | 59.1 (36.4 ; 79.3)        | 17/23                        | 73.9 (51.6 ; 89.8)        |
| ≥4-fold rise       | 18/27                      | 66.7 (46.0 ; 83.5)        | 12/22                          | 54.5 (32.2 ; 75.6)        | 16/23                        | 69.6 (47.1 ; 86.8)        |
| GMT                | 27                         | 3143 (836 ; 11815)        | 25                             | 2338 (593 ; 9226)         | 23                           | 7069 (1361 ; 36725)       |
| GMTR               | 27                         | 16.1 (6.84 ; 37.7)        | 22                             | 9.32 (3.27 ; 26.6)        | 23                           | 36.8 (11.5 ; 118)         |
| <b>18–59 years</b> |                            |                           |                                |                           |                              |                           |
| ≥2-fold rise       | 10/12                      | 83.3 (51.6 ; 97.9)        | 9/13                           | 69.2 (38.6 ; 90.9)        | 10/14                        | 71.4 (41.9 ; 91.6)        |
| ≥4-fold rise       | 8/12                       | 66.7 (34.9 ; 90.1)        | 9/13                           | 69.2 (38.6 ; 90.9)        | 10/14                        | 71.4 (41.9 ; 91.6)        |
| GMT                | 12                         | 6082 (733 ; 50437)        | 15                             | 4070 (714 ; 23200)        | 14                           | 9094 (834 ; 99150)        |
| GMTR               | 12                         | 30.5 (6.94 ; 134)         | 13                             | 16.9 (3.96 ; 71.7)        | 14                           | 58.2 (10.7 ; 316)         |
| <b>≥60 years</b>   |                            |                           |                                |                           |                              |                           |
| ≥2-fold rise       | 10/15                      | 66.7 (38.4 ; 88.2)        | 4/9                            | 44.4 (13.7 ; 78.8)        | 7/9                          | 77.8 (40.0 ; 97.2)        |
| ≥4-fold rise       | 10/15                      | 66.7 (38.4 ; 88.2)        | 3/9                            | 33.3 (7.5 ; 70.1)         | 6/9                          | 66.7 (29.9 ; 92.5)        |
| GMT                | 15                         | 1853 (285 ; 12051)        | 10                             | 1018 (78.4 ; 13219)       | 9                            | 4777 (340 ; 67165)        |
| GMTR               | 15                         | 9.61 (3.30 ; 28.0)        | 9                              | 3.96 (0.749 ; 21.0)       | 9                            | 18.0 (3.21 ; 101)         |
| <b>Day 36</b>      |                            |                           |                                |                           |                              |                           |
| <b>All ages</b>    |                            |                           |                                |                           |                              |                           |
| ≥2-fold rise       | 28/28                      | 100 (87.7, 100)           | 20/22                          | 90.9 (70.8, 98.9)         | 23/23                        | 100 (85.2, 100)           |
| ≥4-fold rise       | 27/28                      | 96.4 (81.7, 99.9)         | 19/22                          | 86.4 (65.1, 97.1)         | 22/23                        | 95.7 (78.1, 99.9)         |
| GMT                | 28                         | 13637 (8187, 22717)       | 25                             | 10216 (4610, 22641)       | 23                           | 26647 (12318, 57643)      |
| GMTR               | 28                         | 75.6 (41.7, 137)          | 22                             | 47.8 (19.0, 121)          | 23                           | 139 (66.6, 288)           |
| <b>18–59 years</b> |                            |                           |                                |                           |                              |                           |
| ≥2-fold rise       | 13/13                      | 100 (75.3, 100)           | 12/13                          | 92.3 (64.0, 99.8)         | 14/14                        | 100 (76.8, 100)           |
| ≥4-fold rise       | 13/13                      | 100 (75.3, 100)           | 12/13                          | 92.3 (64.0, 99.8)         | 14/14                        | 100 (76.8, 100)           |

|                  |       |                      |     |                      |     |                       |
|------------------|-------|----------------------|-----|----------------------|-----|-----------------------|
| GMT              | 13    | 15444 (6271, 38 036) | 15  | 17973 (7274, 44 408) | 14  | 29417 (8365, 103 000) |
| GMTR             | 13    | 92.5 (38.8, 221)     | 13  | 84.5 (23.2, 308)     | 14  | 188 (77.8, 456)       |
| <b>≥60 years</b> |       |                      |     |                      |     |                       |
| ≥2-fold rise     | 15/15 | 100 (78.2, 100)      | 8/9 | 88.9 (51.8, 99.7)    | 9/9 | 100 (66.4, 100)       |
| ≥4-fold rise     | 14/15 | 93.3 (68.1, 99.8)    | 7/9 | 77.8 (40.0, 97.2)    | 8/9 | 88.9 (51.8, 99.7)     |
| GMT              | 15    | 12244 (6349, 23611)  | 10  | 4378 (971, 19736)    | 9   | 22848 (10576, 49361)  |
| GMTR             | 15    | 63.5 (25.6, 157)     | 9   | 21.0 (5.23, 84.6)    | 9   | 86.1 (19.8, 374)      |

GMT = geometric mean titre; GMTR = geometric mean of individual titre ratios (D36/D1); M = number of participants with available data for the relevant endpoint; n = number of participants meeting criteria for ≥2- or 4-fold rise in GMTs.

**Table S11. Neutralising antibody responses to the SARS-CoV-2 Beta variant 14 days after the second injection (D36) (PPAS naïve D1+D22 and PPAS non-naïve D1/D22)**

|                              | Low-dose (5 µg)<br>(N=201) |                  | Medium-dose (10 µg)<br>(N=207) |                  | High-dose (15 µg)<br>(N=203) |                    |
|------------------------------|----------------------------|------------------|--------------------------------|------------------|------------------------------|--------------------|
|                              | M                          | GMT<br>(95% CI)  | M                              | GMT<br>(95% CI)  | M                            | GMT<br>(95% CI)    |
| <b>PPAS-naïve D1+D22</b>     |                            |                  |                                |                  |                              |                    |
| All ages                     | 166                        | 200 (156, 257)   | 173                            | 191 (146, 249)   | 173                          | 283 (223, 359)     |
| 18–59 years                  | 83                         | 255 (181, 359)   | 79                             | 336 (231, 490)   | 81                           | 526 (375, 737)     |
| ≥60 years                    | 83                         | 157 (109, 226)   | 94                             | 118 (83·5, 168)  | 92                           | 164 (122, 221)     |
| <b>PPAS non-naïve D1/D22</b> |                            |                  |                                |                  |                              |                    |
| All ages                     | 28                         | 1676 (774, 3628) | 25                             | 1775 (704, 4474) | 23                           | 2872 (1097, 7518)  |
| 18–59 years                  | 13                         | 2021 (522, 7835) | 15                             | 2752 (924, 8194) | 14                           | 2213 (476, 10 301) |
| ≥60 years                    | 15                         | 1424 (522, 3885) | 10                             | 919 (148, 5724)  | 9                            | 4307 (1540, 12044) |

GMT = geometric mean titre. M = number of participants with available data for the relevant endpoint..

**Table S12. Geometric means of fold-rise from baseline for individual cytokines after stimulation with S protein in whole blood (stimulated values minus negative control) (CMI analysis set)**

|               |     | Low-dose (5 µg)<br>(N=36) |                    | Medium-dose (10 µg)<br>(N=31) |                    | High-dose (15 µg)<br>(N=37) |                    |
|---------------|-----|---------------------------|--------------------|-------------------------------|--------------------|-----------------------------|--------------------|
|               |     | M                         | Ratio (95% CI)     | M                             | Ratio (95% CI)     | M                           | Ratio (95% CI)     |
| IFN $\gamma$  | D22 | 34                        | 6.48 (3.67 ; 11.4) | 29                            | 12.2 (6.50 ; 22.8) | 33                          | 11.1 (5.83 ; 21.1) |
|               | D36 | 33                        | 42.6 (25.2 ; 71.8) | 29                            | 38.9 (20.7 ; 73.3) | 34                          | 27.9 (16.7 ; 46.8) |
| IL-2          | D22 | 34                        | 36.9 (22.4 ; 60.8) | 29                            | 34.7 (19.2 ; 62.7) | 33                          | 32.9 (18.4 ; 58.8) |
|               | D36 | 33                        | 93.5 (66.2 ; 132)  | 29                            | 49.9 (28.7 ; 86.6) | 34                          | 49.2 (31.0 ; 78.0) |
| IL-6          | D22 | 34                        | 7.10 (4.04 ; 12.5) | 29                            | 11.0 (5.33 ; 22.7) | 33                          | 10.2 (6.04 ; 17.3) |
|               | D36 | 33                        | 67.5 (33.0 ; 138)  | 29                            | 71.6 (37.0 ; 138)  | 34                          | 37.8 (16.8 ; 85.1) |
| TNF- $\alpha$ | D22 | 34                        | 9.03 (5.01 ; 16.3) | 29                            | 11.4 (6.61 ; 19.7) | 33                          | 8.87 (4.97 ; 15.8) |
|               | D36 | 33                        | 48.9 (35.0 ; 68.3) | 29                            | 44.4 (29.0 ; 67.9) | 34                          | 32.2 (21.3 ; 48.8) |
| IL-4          | D22 | 34                        | 1.49 (1.18 ; 1.89) | 29                            | 2.18 (1.50 ; 3.17) | 33                          | 2.20 (1.60 ; 3.02) |
|               | D36 | 33                        | 9.19 (6.52 ; 13.0) | 29                            | 6.96 (4.72 ; 10.3) | 34                          | 7.24 (5.03 ; 10.4) |
| IL-5          | D22 | 34                        | 2.77 (2.00 ; 3.84) | 29                            | 4.24 (2.74 ; 6.55) | 33                          | 3.52 (2.48 ; 5.01) |
|               | D36 | 33                        | 20.0 (12.2 ; 32.9) | 29                            | 15.2 (8.75 ; 26.4) | 34                          | 13.3 (8.72 ; 20.1) |
| IL-10         | D22 | 34                        | 2.05 (1.48 ; 2.84) | 29                            | 2.89 (1.92 ; 4.36) | 33                          | 3.03 (2.09 ; 4.40) |
|               | D36 | 33                        | 9.95 (6.28 ; 15.7) | 29                            | 8.77 (4.66 ; 16.5) | 34                          | 10.6 (6.99 ; 16.1) |
| IL-13         | D22 | 34                        | 2.31 (1.62 ; 3.29) | 29                            | 3.84 (2.34 ; 6.28) | 33                          | 3.21 (2.24 ; 4.61) |
|               | D36 | 33                        | 8.94 (5.72 ; 14.0) | 29                            | 8.73 (5.41 ; 14.1) | 34                          | 7.89 (5.23 ; 11.9) |
| IL-17         | D22 | 34                        | 5.98 (3.68 ; 9.70) | 29                            | 8.69 (5.05 ; 15.0) | 33                          | 8.02 (4.73 ; 13.6) |
|               | D36 | 33                        | 23.3 (15.4 ; 35.4) | 29                            | 19.8 (11.2 ; 35.0) | 34                          | 20.0 (11.4 ; 34.9) |
| IL-21         | D22 | 31                        | 244 (108 ; 551)    | 26                            | 379 (168 ; 858)    | 30                          | 345 (151 ; 792)    |
|               | D36 | 30                        | 4316 (2458 ; 7581) | 25                            | 2088 (934 ; 4667)  | 30                          | 1277 (522 ; 3125)  |

**Figure S1. Solicited injection site and solicited systemic adverse reactions occurring over the first seven days after the second vaccination for each antigen group, in younger adults (A; 18–59 years) and older adults (B; ≥60 years)**

**A. 18–59 years**

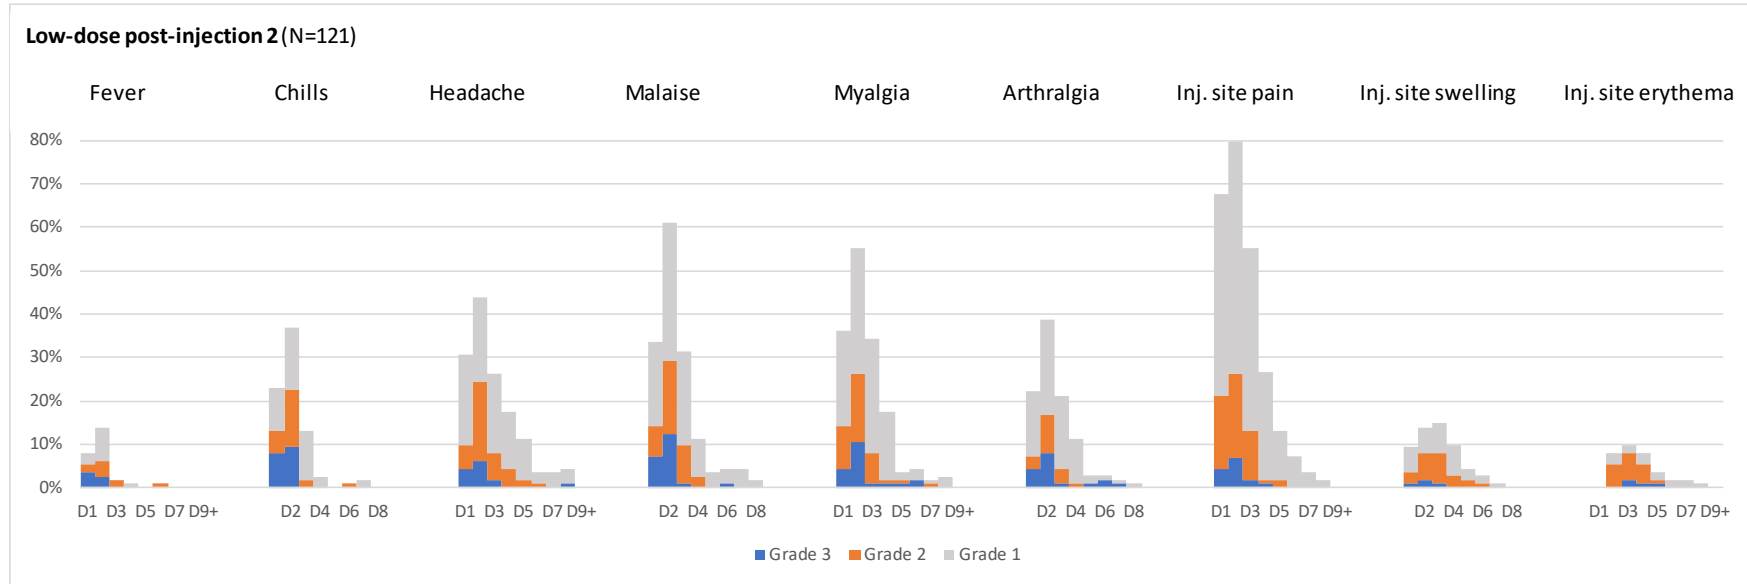

**Medium-dose, post-injection 2 (N=120)**

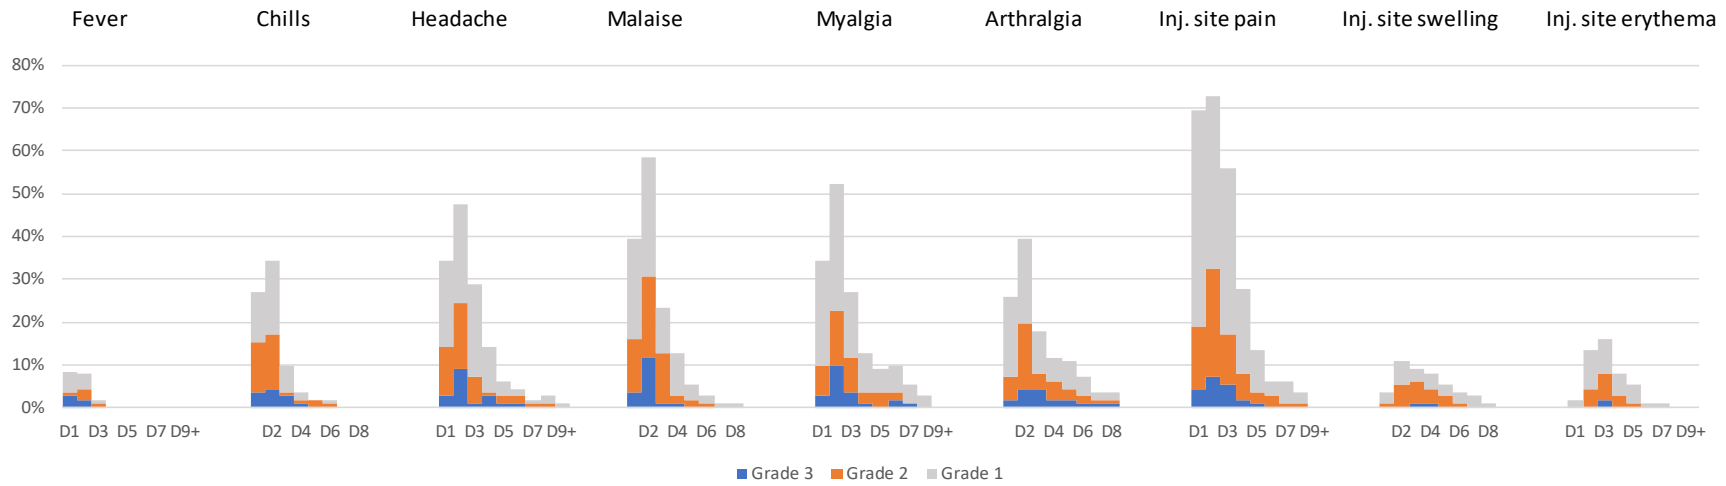

**High-dose, post-injection 2 (N=119)**

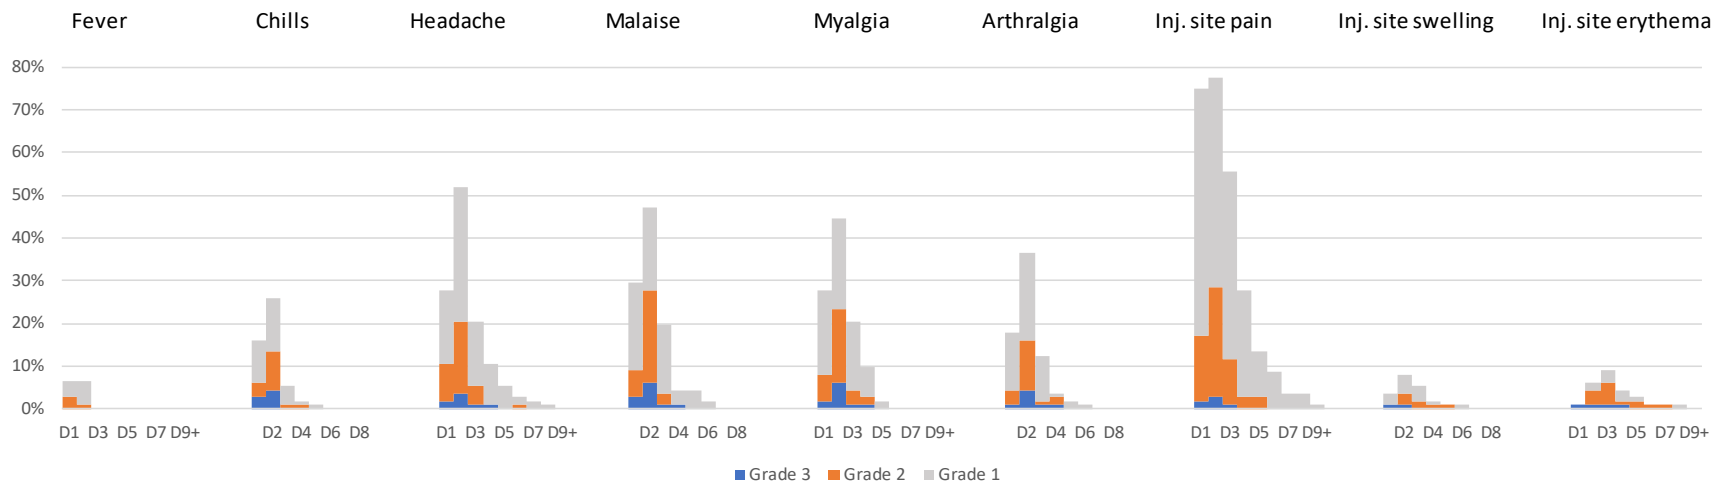

D = study day; Low-dose = 5 µg antigen dose; medium-dose = 10 µg antigen group; high-dose = 15 µg antigen group.

**B. ≥ 60 years**

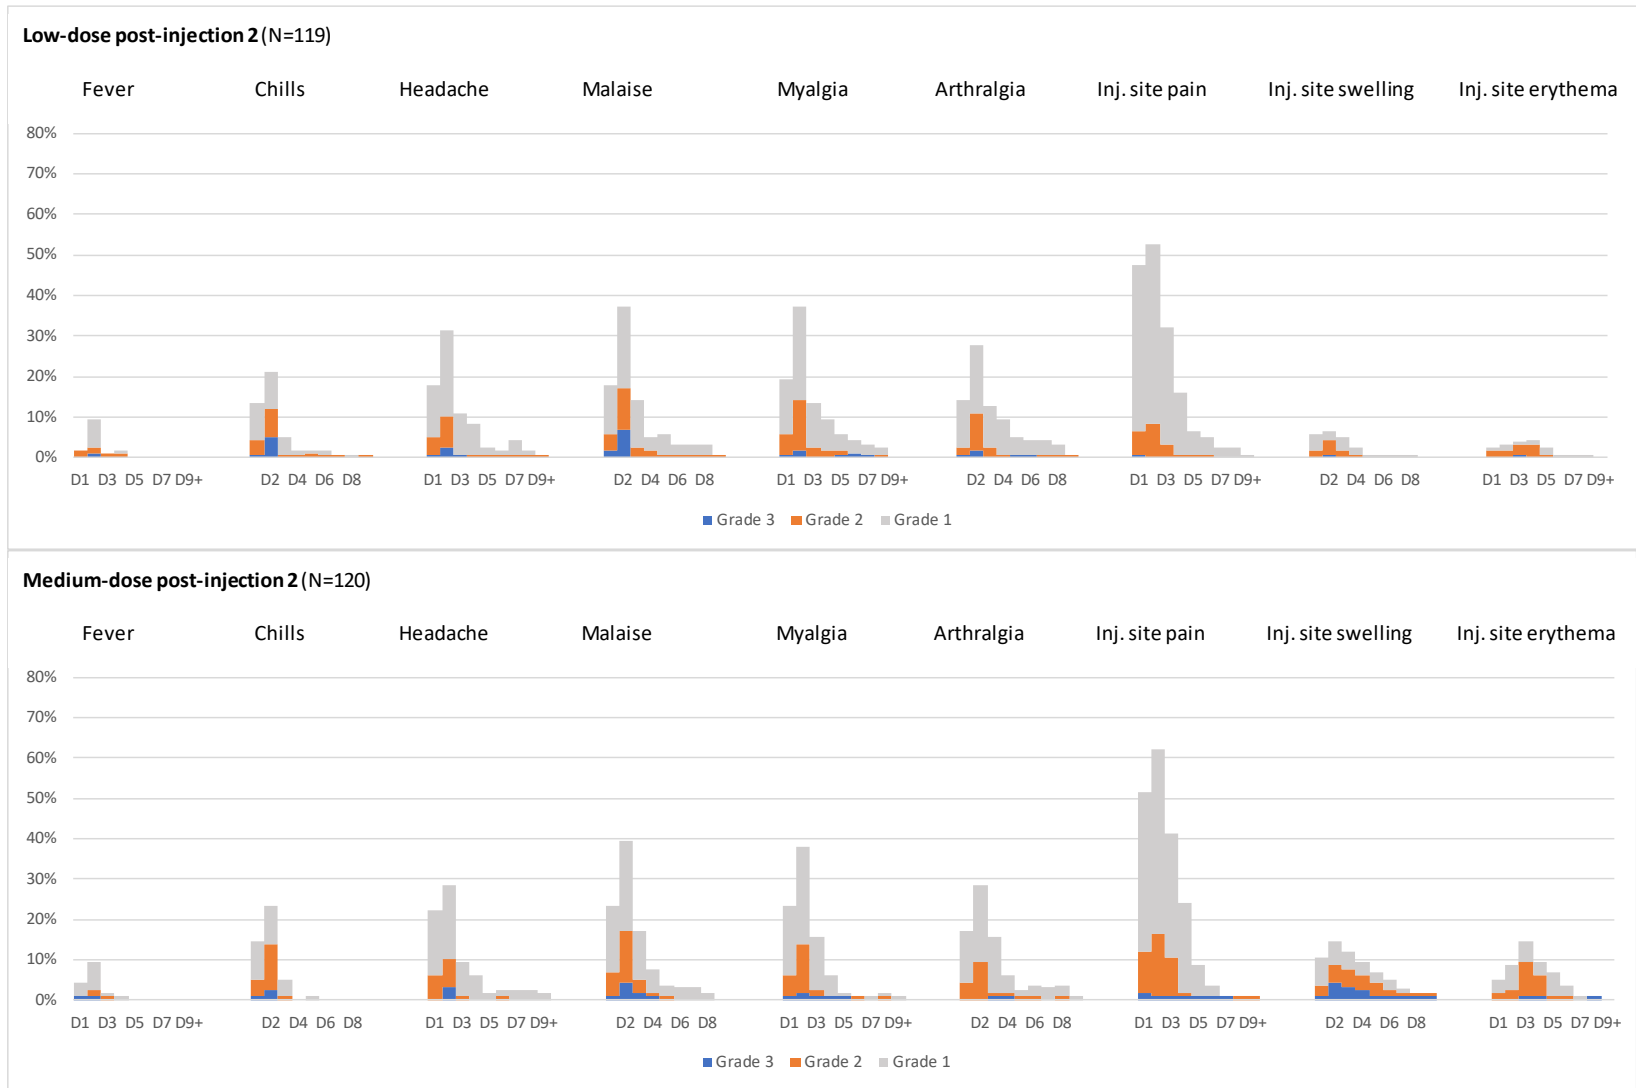

**High-dose post-injection 2 (N=122)**

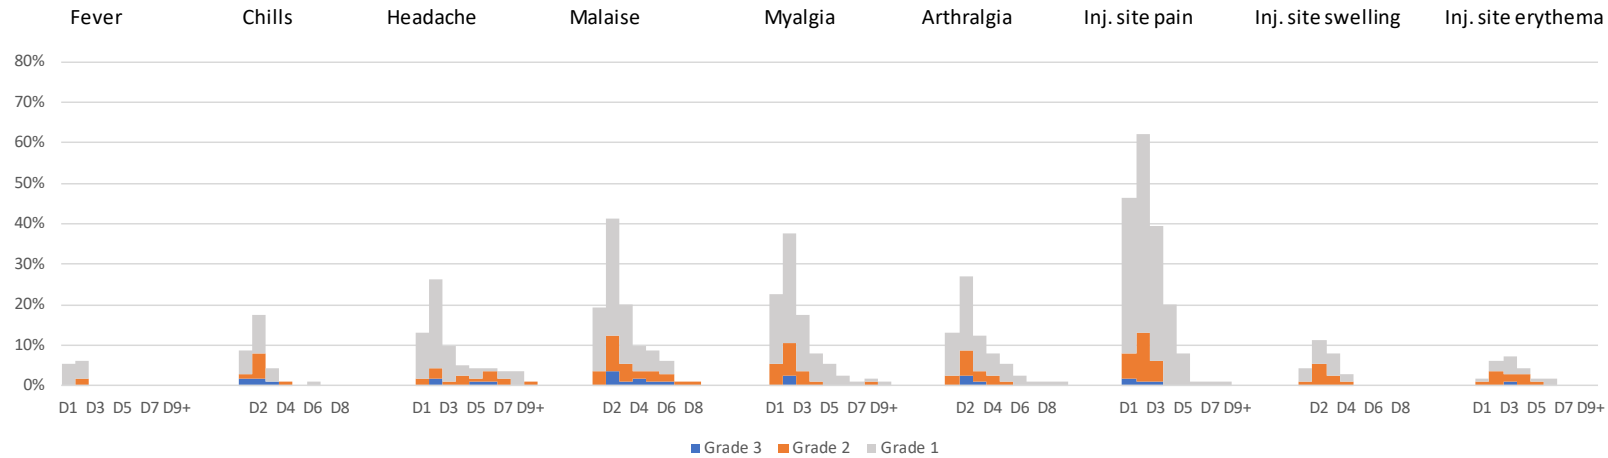

D = study day; Low-dose = 5 µg antigen dose; medium-dose = 10 µg antigen group; high-dose = 15 µg antigen group.



**Figure S2.** Neutralising antibody response to the Beta variant, 14 days after the second injection of CoV2 preS dTM-AS03 (all dose groups combined), by SARS-CoV-2 naïve status

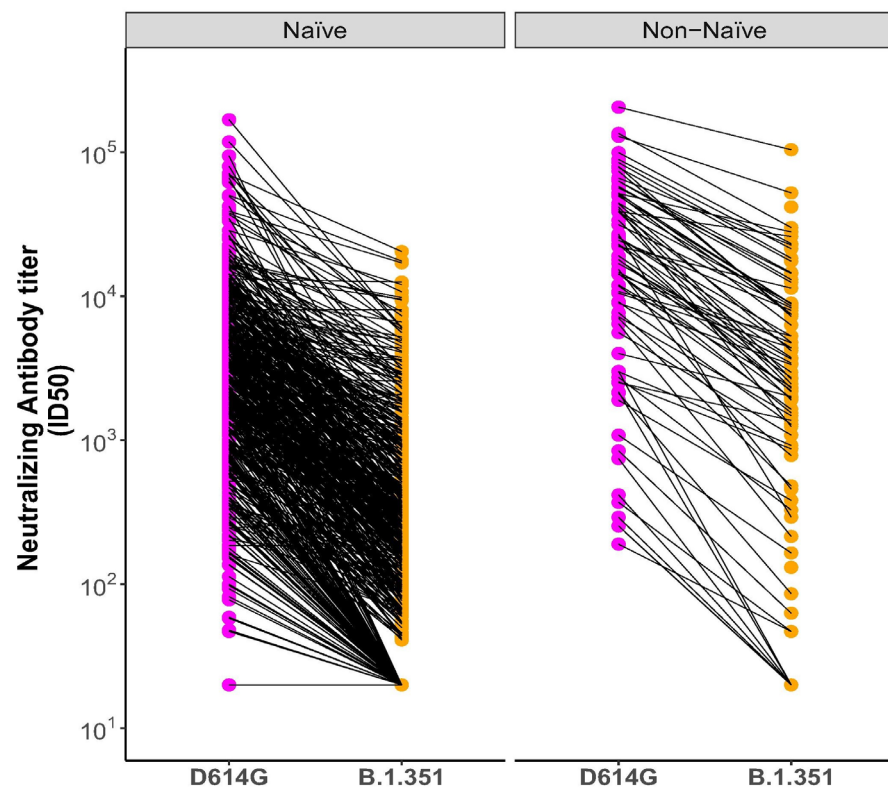

Naïve = the subset of PPAS participants who were SAR-CoV-2-naïve at D1 and D22; N=521; Non-naïve = the subset of PPAS participants who were SAR-CoV-2-non-naïve at D1 and/or D22, N=77

The lower limit of quantification (LLOQ) for the neutralising antibody assay was 1:40, with an upper limit of 1:191,429.

**Figure S3. CMI analyses – ratios of fold-rises for IFN- $\gamma$  (A), IL-2 (B) and TNF- $\alpha$  (C) to IL-4, IL-5 and IL-13 at Day 22 and Day 36 (CMIAS)**

Footnote: CMI = cell mediated immunity. CMIAS = cell mediated immunity analysis set. HD = high-dose (15  $\mu$ g). IFN = interferon. IL = interleukin. LD = Low-dose (5  $\mu$ g). MD = medium-dose (10  $\mu$ g). TNF = tumour necrosis factor.  
Error bars denote 95% confidence intervals.

A

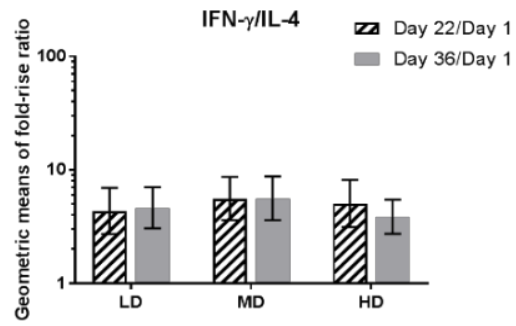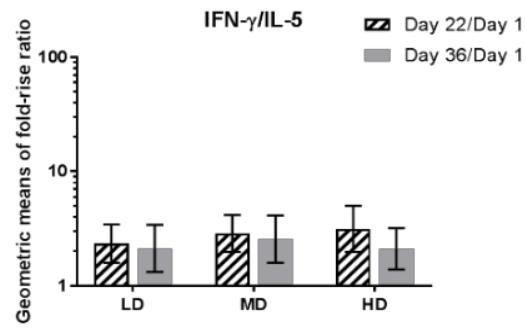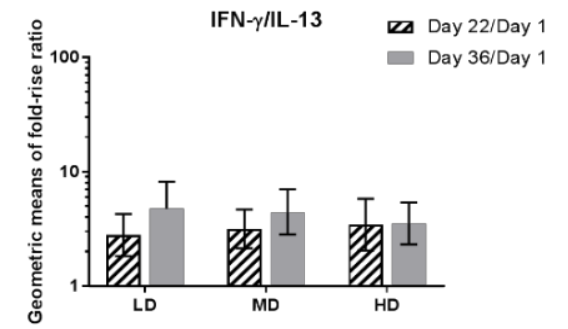

B

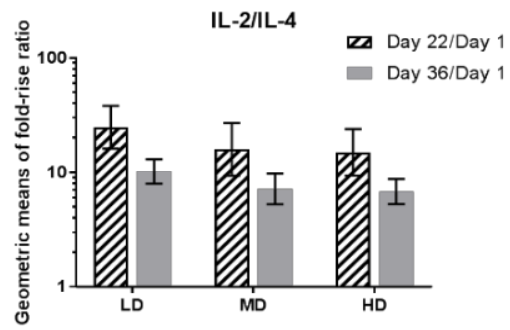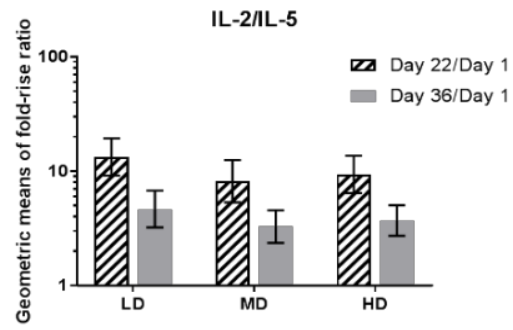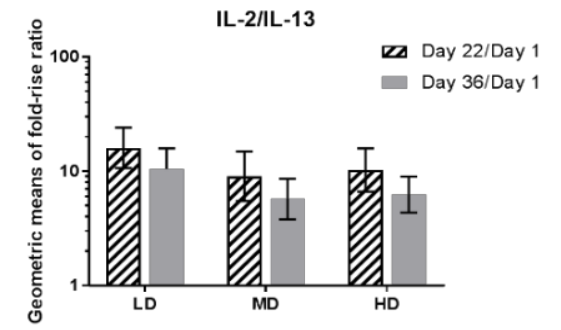

C

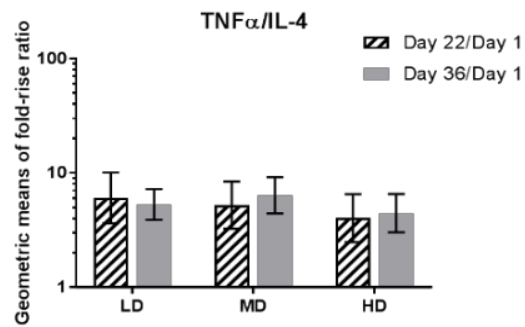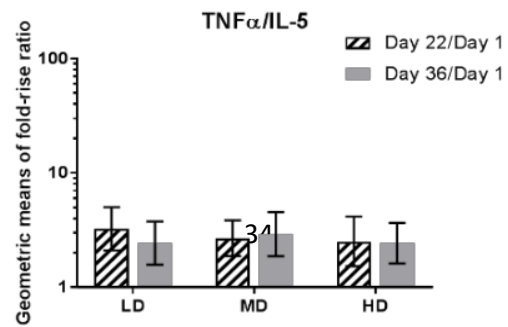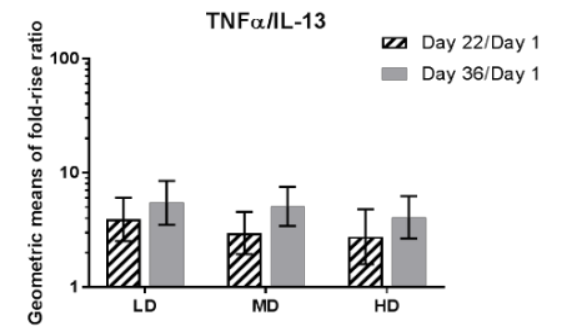

Supplement: mmc1.pdf [file mmc1.pdf]
